# Supplementary material
Source: PubMed Central journal article supplement (PMC2789551)
Supplement: NIHMS73673-supplement-Supplementary_Data.pdf [file NIHMS73673-supplement-Supplementary_Data.pdf]

Revised 12 April 2007

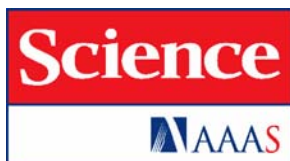

[www.sciencemag.org/cgi/content/full/316/5821/112/DC1](http://www.sciencemag.org/cgi/content/full/316/5821/112/DC1)

## Supporting Online Material for

### A Single *IGF1* Allele Is a Major Determinant of Small Size in Dogs

Nathan B. Sutter, Carlos D. Bustamante, Kevin Chase, Melissa M. Gray, Keyan Zhao, Lan Zhu, Badri Padhukasahasram, Eric Karlins, Sean Davis, Paul G. Jones, Pascale Quignon, Gary S. Johnson, Heidi G. Parker, Neale Fretwell, Dana S. Mosher, Dennis F. Lawler, Ebenezer Satyaraj, Magnus Nordborg, K. Gordon Lark, Robert K. Wayne, Elaine A. Ostrander\*

\*To whom correspondence should be addressed. E-mail: [eostrand@mail.nih.gov](mailto:eostrand@mail.nih.gov)

Published 6 April, *Science* **316**, 112 (2007)  
DOI: 10.1126/science.1137045

#### **This PDF file includes:**

Materials and Methods  
Figs. S1 to S9  
Tables S1 to S6  
References

#### **Revised 12 April 2007:**

In the fig. S1 legend, the labels for two genotypes in the histogram were reversed. The solid line with closed triangles represents I/I, and the gray line with closed circles represents B/B.  
In the fig. S7 legend, a Fig. 2 reference has been changed to a Fig. 3A reference.

## Supporting Online Material

### Materials and Methods

Figures S1 – S9

Tables S1 – S6

References

### Materials and methods

#### *Sample and Data Collection*

Whole blood was collected from purebred dogs with written consent from dog owners. Wild canid genomic DNA samples were also typed (1). This process was reviewed and approved by the animal care and use committees at the National Human Genome Research Institute, University of Utah, and the University of Missouri. Genomic DNA was extracted from blood by a standard phenol-chloroform protocol. Portuguese water dog samples were whole genome amplified (repli-G kit, Qiagen) prior to SNPlex genotyping but un-amplified DNA was used for sequence based marker discovery.

SNPs and insertion/deletion polymorphisms (Table. S4) were discovered by sequencing PCR amplicons (Table. S3) from dog genomic DNA. Sequencing reactions (Applied Biosystems) were bi-directional from exonuclease/shrimp alkaline phosphatase cleaned PCR amplicons by standard methods. Sequence data were collected on an ABI 3730xl and aligned and genotyped using phred/phrap and consed. SNP genotyping utilized the SNPlex platform (Applied Biosystems) following the manufacturer's protocol with 40-200 ng genomic DNA (small and giant breeds) or 80-200 ng whole genome amplified genomic DNA (Portuguese water dog) from each sample.

Serum levels of *IGF1* in Portuguese water dogs were measured by ELISA following standard methods.

#### *Mixed model for Portuguese water dog fine-mapping*

A mixed model was applied for fine mapping within the Portuguese water dog population since the shared ancestry within the breed could lead to spurious associations. To reduce the affect of this cryptic relatedness between dogs, we applied the mixed model analysis of Yu et al (2) using:

$$\mathbf{Y} = \mathbf{X}\boldsymbol{\alpha} + \mathbf{Z}\mathbf{u} + \mathbf{e}$$

where  $\mathbf{Y}$  is the vector of the skeletal size trait;  $\boldsymbol{\alpha}$  is a vector of fixed effect, the SNP effect we are testing;  $\mathbf{u}$  is a vector of random effect reflecting the polygenetic background; and  $\mathbf{X}$  and  $\mathbf{Z}$  are known incidence matrices relating the observations to fixed and random effects, respectively. The essential idea is that relatedness is incorporated into the model. The variance in the model can be expressed as:

$$\text{Var} \begin{bmatrix} \mathbf{u} \\ \mathbf{e} \end{bmatrix} = \begin{bmatrix} \mathbf{K}\sigma_u^2 & 0 \\ 0 & \mathbf{I}\sigma_e^2 \end{bmatrix}$$

where  $\mathbf{K}$  is the consanguinity matrix estimated from the known pedigree, which reflects the genetic background correlations between individuals.

#### *Mann-Whitney U test for association*

When testing for association across structured populations such as dog breeds, there is a large inflation of nominal p-values in Fisher's exact test that is caused by the relatedness between samples within populations (see Fig. S6). Because dogs from different breeds are only very distantly related, a reasonable strategy is to only remove cryptic relatedness within breeds by collapsing the information obtained from dogs within the same breed into an allele frequency distribution. For each breed, we first calculated the relative frequency of the minor allele at a marker and then conducted a Mann-Whitney U test comparing the frequency in small dog breeds with the frequency in giant dog breeds. The test rejects the null hypothesis of no association if there is a large difference in the median allele frequency across small breeds as compared to the median frequency in large breeds.

#### *Estimation of the ancestral recombination graph*

An ancestral recombination graph was reconstructed for a 1.2 Mb interval (chr15:43.7-44.9 Mb) that includes the *IGF1* core region from 1052 sequences of all small and giant dog breeds and is rooted with data from the golden jackal (*Canis aureus*) using the software SHRUB (3) [<http://www.cs.ucdavis.edu/~yssong/lu.html>]. Given a set of sequences and the ancestral sequence, SHRUB uses efficient branch and bound methods

to compute the minimum number of recombination events necessary to explain the data and generates ARGs consistent with the data.

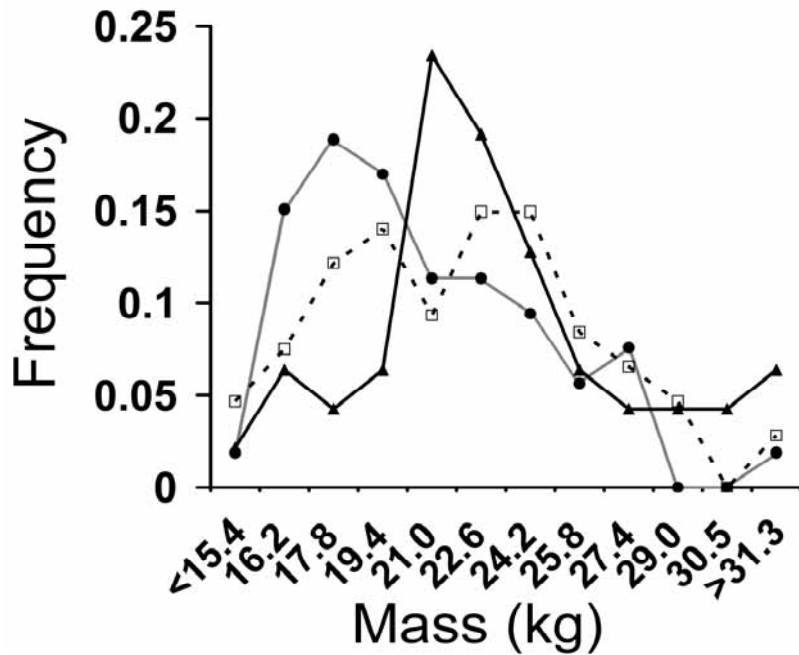

**Supplementary Figure S1.** Portuguese water dog *IGF1* haplotypes and mass.

Haplotypes were inferred for 20 markers spanning the *IGF1* gene (cfa15:44,212,792-44,278,140, Canfam1). Out of the 720 chromosomes with successful inference, 96% carry one of just two haplotypes, “B” and “I”, identical to haplotypes inferred for small and giant dogs, respectively (see Fig. 3). Data are graphed as a histogram for each genotype: I/I (closed triangle, solid line), B/I, (open square, dashed line) and B/B (closed circle, grayed line).

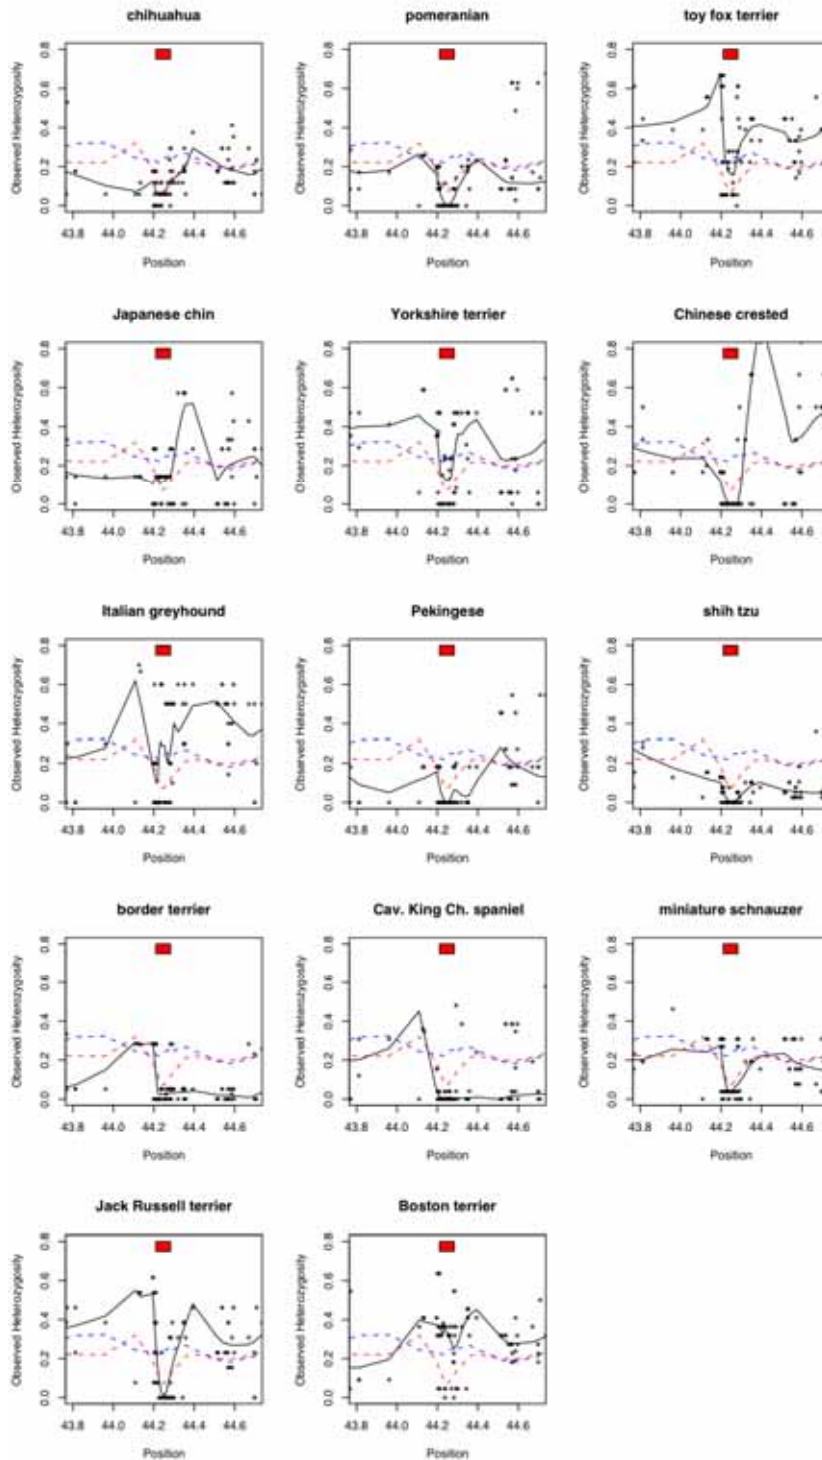

**Supplementary Figure S2.** Observed heterozygosity for markers spanning *IGF1* in individual small dog breeds. The x-axis indicates marker position on canine chromosome 15 and the red box indicates the position of *IGF1*. Only breeds with data from at least 10 chromosomes are shown.

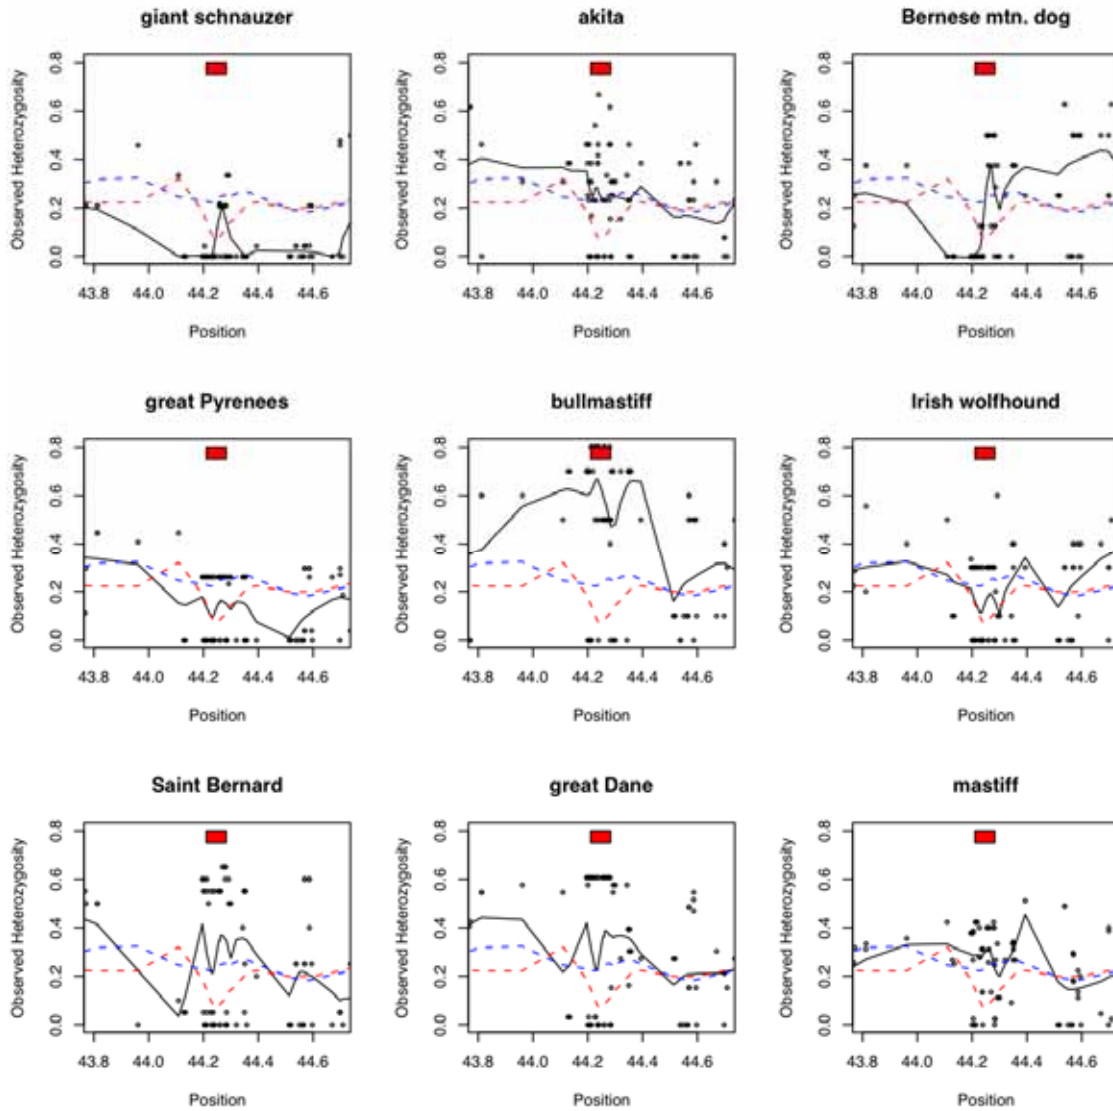

**Supplementary Figure S3.** Observed heterozygosity for markers spanning *IGF1* in individual giant dog breeds. The X-axis indicates marker position on canine chromosome 15 and the red box indicates the position of *IGF1*. Only breeds with data from at least 10 chromosomes are shown.

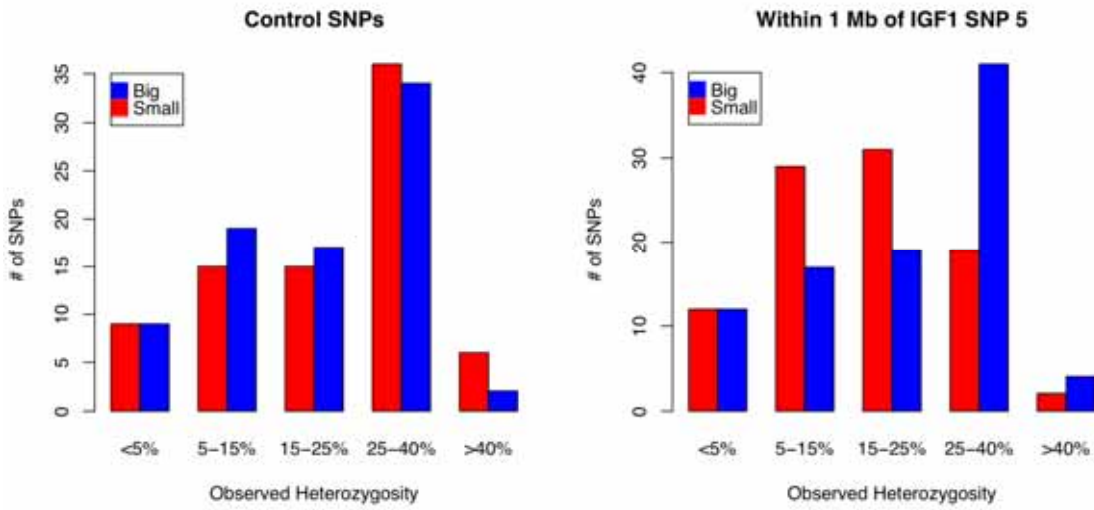

**Supplementary Figure S4.** Distribution of observed heterozygosity for 83 genomic control SNPs and SNPs at the *IGF1* locus.

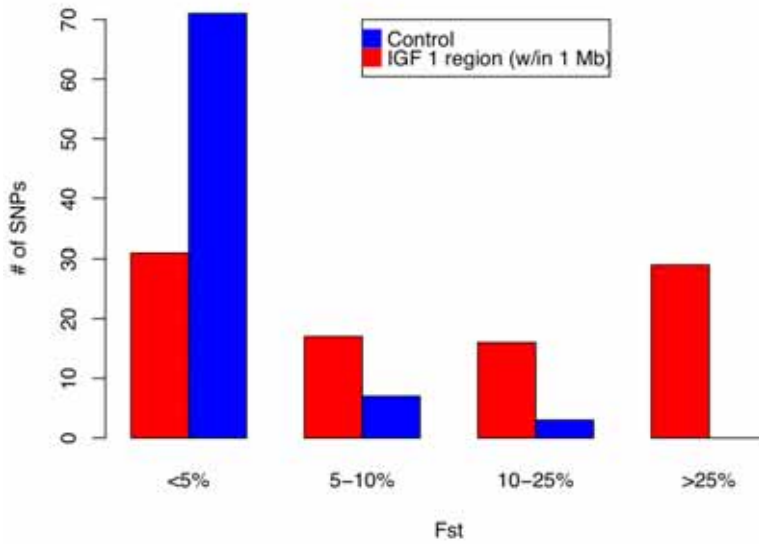

**Supplementary Figure S5.** Distribution of  $F_{st}$  between small and giant breeds for 83 genomic control SNPs (blue) and SNPs in the *IGF1* locus (red).



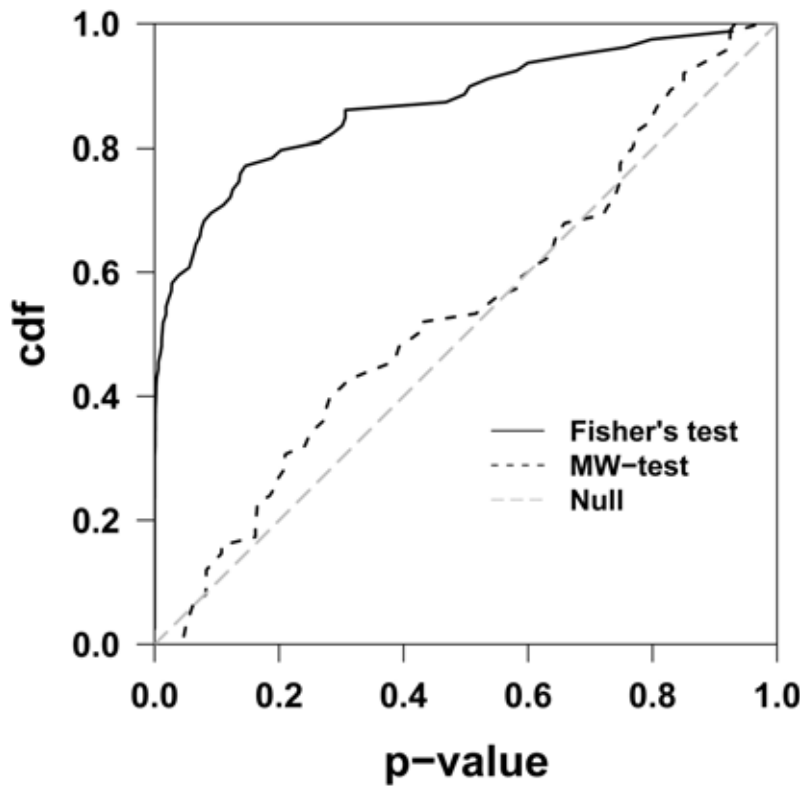

**Supplementary Figure S6.** Cumulative distribution function for Fisher's exact test and Mann-Whitney U statistic calculated from 83 genomic control SNPs genotyped in small and giant dogs.

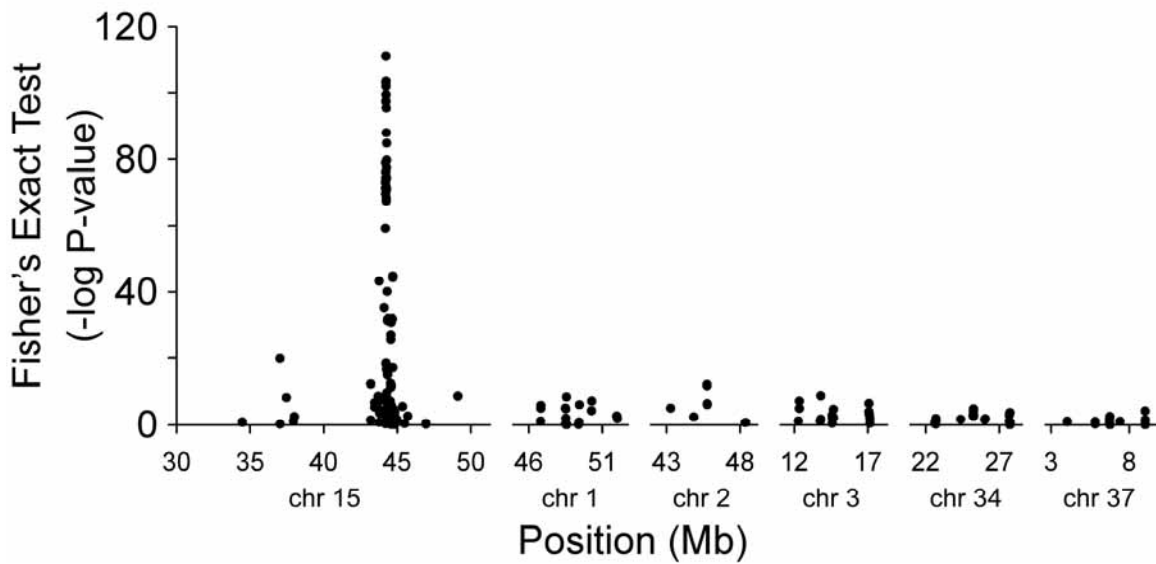

**Supplementary Figure S7.** Fisher's exact test p-values for tests of association between individual SNPs and body size (small vs. giant) for 116 SNPs on chromosome 15 and 83 SNPs on five control chromosomes. Only breeds with data for at least ten chromosomes were included (14 small and 9 giant breeds). Note that, unlike p-values in Fig. 3A, these p-values clearly reflect confounding by population structure (see Material and Methods).

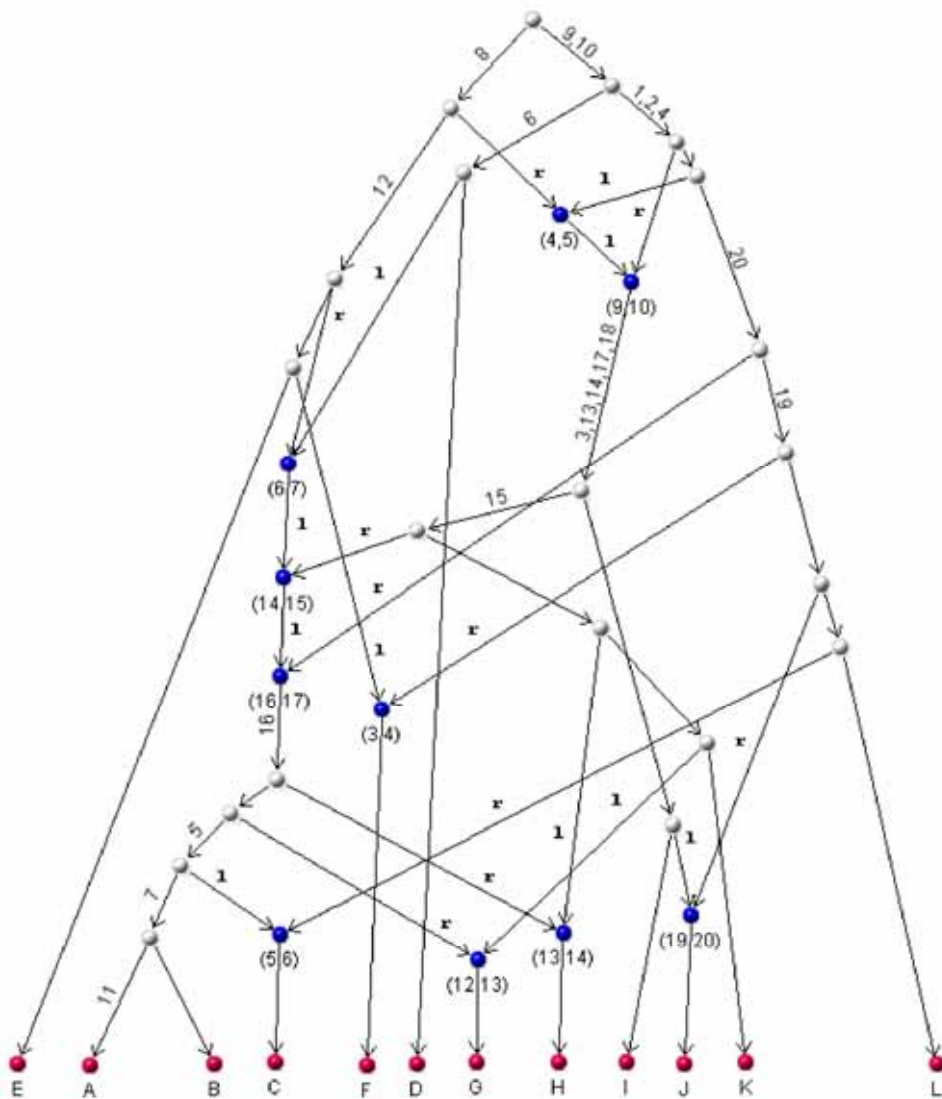

## Haplotype

**Supplementary Figure S8.** An ancestral recombination graph that is consistent with the 12 haplotypes shown in Fig. 3B for the interval chr15:44,212,792 – 44,278,140. Red dots denote the 12 haplotypes, white dots denote coalescent events and blue dots indicate recombination vertices. The numbers in parentheses below recombination vertices denote breakpoint intervals, given as SNP positions reading from left to right in Fig 3b. Numbers along the edges in the graph indicate mutations. Recombination branches are labeled "l" or "r" to denote material to the left or right of recombination breakpoints.

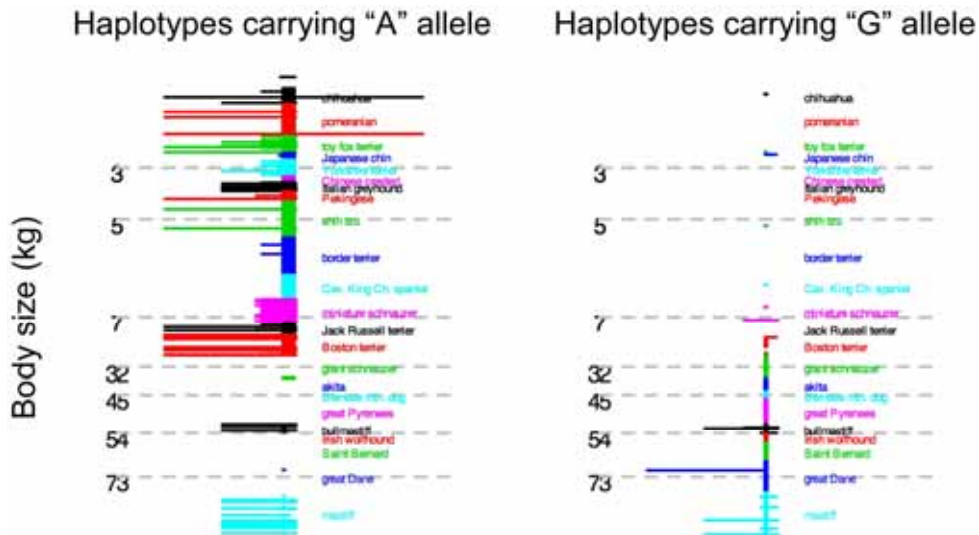

**Supplementary Figure S9.** Haplotype sharing among 952 dog chromosomes from 22 breeds. We display the longest region containing SNP 5 (chr15:44,228,468) in both 5' and 3' directions until a recombination breakpoint is inferred from an ancestral recombination graph. Haplotypes carrying the SNP 5 “A” allele are shown in the left hand column and those carrying the “G” allele in the right hand column. Within each column the rows are individual chromosomes colored to indicate the breed from which they were sampled. Chromosomes are sorted according to the size of the breed from which they were sampled with small breeds at the top and giant breeds at the bottom. An empty row position indicates chromosomes in a breed that do not carry the given SNP 5 allele. For example, the empty rows at the top of the right hand column illustrate the rarity of the SNP 5 “G” allele in the small breeds. Non-recombined intervals with the SNP 5 “A” allele, regardless of whether they occur in small or giant dogs, are much longer on average (median length = 51.4 kb) than non-recombined intervals with the “G” allele (median = 9.9 kb;  $p < 10^{-16}$ , Mann-Whitney U test).

**Supplementary Table S1.** SNP genotypes from wild canids for *IGF1* SNP "5" (chr 15:44,228,468 CanFam1). Entries within the table are the count of chromosomes for each species and, for *Canis lupus*, each population.

| Species                         | common name   | population   | G   | A |
|---------------------------------|---------------|--------------|-----|---|
| <i>Canis lupus</i>              | grey wolf     |              |     |   |
|                                 |               | Alaska       | 46  | 0 |
|                                 |               | China        | 4   | 0 |
|                                 |               | Croatia      | 6   | 0 |
|                                 |               | India        | 10  | 0 |
|                                 |               | Isle Royale  | 18  | 0 |
|                                 |               | Israel       | 68  | 0 |
|                                 |               | Italy        | 24  | 0 |
|                                 |               | Mexico       | 4   | 0 |
|                                 |               | Minnesota    | 52  | 0 |
|                                 |               | N. Canada    | 36  | 0 |
|                                 |               | NW Territory | 56  | 0 |
|                                 |               | Quebec       | 2   | 0 |
|                                 |               | Spain        | 40  | 0 |
|                                 |               | Yellowstone  | 28  | 0 |
|                                 |               | wolf total   | 394 | 0 |
| <i>C. rufus</i>                 | red wolf      |              | 6   | 0 |
| <i>C. latrans</i>               | coyote        |              | 24  | 0 |
| <i>C. aureus</i>                | golden jackal |              | 32  | 0 |
| <i>Urocyon cinereoargenteus</i> | gray fox      |              | 28  | 0 |
| <i>U. littoralis</i>            | island fox    |              | 24  | 0 |

**Supplementary Table S2.** Haplotype inference for six tagging SNPs spanning 50 kb within the *IGF1* gene in a sample of 3231 dogs from 143 breeds. Haplotypes are shown vertically with genome position in the Canfam1 assembly to the left. These haplotypes match the more highly resolved haplotypes from Fig. 3b as indicated by letters shown at the bottom of eight of these haplotypes. Major haplotype groups from Fig. 3b (e.g. ‘B’, ‘C’, ‘F’ and ‘I’) are all resolved from one another. Marker ancestral states are inferred from golden jackal genotyping and are colored white. Derived alleles are colored gray. Entries within the table are the count of chromosomes for each breed. PHASE inference and chromosome counting follows the method for Fig. 3.

|                  |          |   |   |   |   |   |   |   |   |   |   |   |   |   |   |
|------------------|----------|---|---|---|---|---|---|---|---|---|---|---|---|---|---|
| <b>Position:</b> | 44212792 | T | C | C | C | C | C | C | C | C | T | T | T | C | T |
|                  | 44226324 | G | G | G | G | G | G | G | G | G | A | A | A | A | G |
|                  | 44226684 | C | C | C | C | C | C | C | T | T | T | T | T | T | T |
|                  | 44228468 | A | A | A | A | G | G | G | G | G | G | G | G | G | G |
|                  | 44237388 | G | G | A | G | A | G | G | A | G | A | G | G | G | A |
|                  | 44260949 | A | A | G | G | G | A | G | G | G | G | A | G | G | G |

**Fig. 3 Haplotype(s) tagged:**      **AB**   **C**      **D**      **E**   **F**      **GH**   **IJK**      **L**

| <b>Size (kg)</b> | <b>Breed</b>           | AB | C  | D | E | F  | GH | IJK | L |
|------------------|------------------------|----|----|---|---|----|----|-----|---|
| 2                | Toy Fox Terrier        | 35 | 1  |   |   |    |    | 2   |   |
| 2                | Maltese                | 51 | 1  |   |   |    |    |     |   |
| 2                | Pomeranian             | 54 | 2  |   |   |    |    |     |   |
| 2                | Chihuahua              | 65 | 1  |   |   |    |    |     |   |
| 3                | Manchester Terrier Toy | 34 |    |   |   |    |    |     |   |
| 3                | Japanese Chin          | 41 |    |   |   |    |    | 3   |   |
| 3                | Yorkshire Terrier      | 42 | 6  |   |   |    |    |     |   |
| 3                | Chinese Crested        | 56 |    |   |   |    |    |     |   |
| 4                | Affenpinscher          | 22 |    |   |   |    |    |     |   |
| 4                | Italian Greyhound      | 29 | 11 |   |   |    |    |     |   |
| 4                | Papillon               | 46 |    |   |   |    |    | 2   |   |
| 4                | Poodle Toy             | 49 | 1  |   |   |    |    |     |   |
| 4                | Brussels Griffon       | 50 |    |   |   |    |    |     |   |
| 4                | Pekingese              | 49 |    |   |   |    |    | 5   |   |
| 5                | Silky Terrier          | 25 | 1  |   |   |    |    |     |   |
| 5                | Havanese               | 29 |    |   |   |    |    | 5   |   |
| 5                | Shih Tzu               | 36 |    |   |   |    |    |     |   |
| 5                | Australian Terrier     | 40 |    |   |   |    |    |     |   |
| 5                | Miniature Pinscher     | 44 | 2  |   |   |    |    |     |   |
| 5                | Norfolk Terrier        | 13 |    |   |   | 35 |    |     |   |
| 5                | Bichon Frise           | 38 | 1  |   |   |    |    | 15  |   |
| 5                | Norwich Terrier        | 51 |    |   |   | 3  |    |     |   |



|    |                                |    |    |    |   |   |    |    |   |   |    |    |    |   |   |
|----|--------------------------------|----|----|----|---|---|----|----|---|---|----|----|----|---|---|
| 20 | Field Spaniel                  | 8  |    |    |   |   |    |    |   |   |    |    | 4  |   |   |
| 20 | Welsh Springer Spaniel         | 9  | 25 |    |   |   |    |    |   |   |    |    |    |   |   |
|    | Nova Scotia Duck Tolling       |    |    |    |   |   |    |    |   |   |    |    |    |   |   |
| 20 | Retriever                      | 38 |    |    |   |   |    |    |   |   |    |    | 2  |   |   |
| 22 | Ibizan Hound                   | 11 |    |    |   |   | 4  |    |   |   |    |    | 25 |   |   |
| 23 | Pharaoh Hound                  |    |    |    |   |   |    |    |   |   |    |    | 29 |   |   |
| 23 | Saluki                         |    |    |    |   |   | 42 |    |   |   |    |    | 6  |   |   |
| 23 | Portuguese Water Dog           | 13 |    |    |   |   |    |    |   |   |    |    | 36 |   |   |
| 23 | English Springer Spaniel       | 26 | 8  | 1  |   |   | 2  |    |   |   |    |    | 15 |   |   |
| 23 | Norwegian Elkhound             | 9  | 1  |    |   |   | 7  |    |   |   |    |    | 35 |   |   |
| 23 | Bearded Collie                 |    |    |    |   |   | 68 |    |   |   |    |    | 8  |   |   |
| 24 | Bulldog                        | 24 |    |    |   |   |    |    |   |   |    |    | 8  |   |   |
| 24 | Chinese Shar Pei               | 8  |    | 1  | 1 |   | 2  | 13 |   |   | 1  |    | 11 |   |   |
| 24 | English Bulldog                | 33 | 1  |    |   |   |    |    |   |   |    |    | 6  |   |   |
| 24 | Siberian Husky                 |    |    |    |   |   | 29 | 3  |   |   |    |    | 16 |   |   |
| 24 | Hungarian Vizsla               | 18 |    |    |   |   |    |    |   |   | 1  |    | 31 |   |   |
| 25 | Wirehaired Pointing Griffon    |    |    |    |   |   |    |    |   |   |    |    | 12 |   |   |
| 25 | Irish Water Spaniel            |    |    |    |   |   |    |    |   |   |    |    | 26 |   |   |
| 25 | Poodle Standard                | 14 |    |    |   |   |    |    |   |   |    |    | 18 |   |   |
| 25 | Australian Shepherd Dog        | 2  | 15 |    |   |   | 6  |    |   |   |    |    | 11 |   |   |
| 25 | Samoyed                        | 2  |    |    |   |   | 30 |    |   |   |    |    | 14 |   |   |
| 25 | Dalmatian                      | 1  | 12 | 27 |   |   |    |    |   |   |    |    | 16 |   |   |
| 26 | Basset Hound                   | 2  | 1  | 1  |   |   |    |    |   |   |    | 1  | 33 | 1 |   |
| 26 | Airedale Terrier               | 34 |    |    |   |   |    |    |   |   |    |    | 6  |   | 2 |
| 27 | American Staffordshire Terrier | 29 |    |    |   |   |    |    |   |   |    |    | 5  |   |   |
| 28 | Irish Red and White Setter     | 1  | 4  |    |   |   |    |    |   |   |    |    | 13 |   |   |
| 28 | Belgian Malinois               | 3  |    |    |   |   | 2  |    |   |   |    |    | 17 |   |   |
| 28 | Weimaraner                     | 7  |    |    |   |   | 1  |    |   |   |    |    | 21 |   |   |
| 28 | Afghan Hound                   | 1  |    | 1  | 1 | 1 | 13 | 7  | 2 | 3 |    |    | 7  |   |   |
| 28 | German Shorthaired Pointer     | 6  | 7  |    |   |   |    |    |   |   |    | 1  | 40 |   |   |
| 29 | Boxer                          |    |    |    |   |   |    |    |   |   |    |    | 40 |   |   |
| 29 | Pointer                        |    |    |    |   |   |    |    |   |   |    |    | 42 |   |   |
| 29 | Bull Terrier                   | 39 |    |    |   |   |    |    |   |   |    |    | 5  |   |   |
| 29 | German Wirehaired Pointer      | 16 |    |    |   |   |    |    |   | 3 |    |    | 26 |   |   |
| 29 | Belgian Sheepdog               |    |    |    |   |   |    |    |   |   |    |    | 48 |   |   |
| 29 | Flat Coated Retriever          |    | 5  |    |   |   |    |    |   |   |    | 19 | 32 |   |   |
| 29 | Old English Sheepdog           |    | 4  |    |   |   | 4  |    |   |   |    |    | 48 |   |   |
| 30 | Greyhound                      |    |    |    |   |   | 20 |    |   |   |    |    | 12 |   |   |
| 30 | Labrador Retriever             | 14 | 9  |    |   |   | 9  |    |   |   | 3  |    | 39 |   |   |
| 31 | English Setter                 | 22 |    |    |   |   |    |    |   |   |    |    | 16 |   |   |
| 31 | Gordon Setter                  |    | 4  |    |   |   |    |    |   |   |    |    | 39 | 1 |   |
| 31 | Collie                         |    |    |    |   |   | 72 |    |   |   |    |    | 8  |   |   |
| 32 | Giant Schnauzer                |    |    |    |   |   |    |    |   |   | 10 |    | 28 |   |   |
| 32 | Belgian Tervuren               |    |    |    |   |   |    |    |   |   |    |    | 44 |   |   |
| 32 | Clumber Spaniel                | 1  | 16 |    |   |   |    |    |   |   |    |    | 33 |   |   |
| 32 | Irish Setter                   |    | 2  |    |   |   |    |    |   |   |    |    | 50 |   |   |
| 32 | Italian Spinone                | 6  |    |    |   |   | 13 |    |   |   |    |    | 33 |   |   |
| 32 | Golden Retriever               | 4  | 1  | 1  |   |   |    |    |   |   |    | 17 | 31 |   |   |
| 33 | Chesapeake Bay Retriever       | 7  | 9  |    |   |   |    | 12 |   |   |    |    | 4  |   | 8 |



|    |                            |    |   |   |    |   |    |    |    |  |    |    |    |    |
|----|----------------------------|----|---|---|----|---|----|----|----|--|----|----|----|----|
| 33 | Curly Coated Retriever     | 11 |   |   |    |   |    | 2  |    |  |    | 35 |    |    |
| 34 | Briard                     |    |   |   |    |   |    |    |    |  |    | 42 |    |    |
| 34 | Rhodesian Ridgeback        | 6  |   | 1 |    |   |    | 9  |    |  | 1  | 28 |    | 8  |
| 35 | Dobermann Pinscher         |    |   |   |    |   |    | 26 |    |  |    | 28 |    |    |
| 37 | German Shepherd Dog        |    |   |   |    |   |    | 4  |    |  | 2  | 46 |    |    |
| 38 | Bouvier Des Flanders       |    |   |   |    |   |    |    |    |  |    | 62 |    |    |
| 39 | Komondor                   |    |   |   |    |   |    | 13 |    |  |    | 5  |    |    |
| 40 | Alaskan Malamute           |    |   |   |    |   |    | 48 |    |  |    | 10 |    |    |
| 41 | Scottish Deerhound         |    | 4 |   |    |   |    | 14 |    |  |    | 16 |    |    |
| 41 | Borzoi                     |    |   |   |    |   |    | 35 |    |  |    | 23 |    |    |
| 44 | Akita                      |    |   |   | 27 |   | 11 | 5  | 1  |  |    | 2  | 1  |    |
| 45 | Bloodhound                 |    |   |   |    |   |    | 3  |    |  |    | 3  | 38 |    |
| 45 | Rottweiler                 | 48 |   |   |    |   |    | 2  |    |  |    |    |    |    |
| 45 | Bernese Mountain Dog       | 3  |   |   |    |   |    |    |    |  | 25 | 30 |    |    |
| 50 | Black Russian Terrier      | 7  |   |   |    |   |    |    |    |  |    | 9  |    |    |
| 50 | Pyrenean Mountain Dog      |    |   |   |    |   |    | 5  |    |  |    | 47 |    |    |
| 52 | Chow Chow                  | 7  |   |   | 21 | 2 | 2  | 6  | 10 |  |    | 2  |    |    |
| 54 | Leonberger                 |    |   |   |    |   |    | 7  |    |  |    | 13 |    |    |
| 54 | Irish Wolfhound            |    |   |   |    |   |    | 2  |    |  |    | 20 |    |    |
| 54 | Bullmastiff                | 15 |   |   |    |   |    | 1  |    |  |    | 25 |    | 15 |
| 59 | Saint Bernard              |    |   |   |    |   |    | 13 |    |  |    | 31 |    |    |
| 60 | Greater Swiss Mountain Dog |    |   |   |    |   |    |    |    |  |    | 43 |    | 1  |
| 64 | Newfoundland               |    |   |   |    |   |    | 15 |    |  |    | 41 |    |    |
| 73 | Great Dane                 |    |   |   |    |   |    | 24 |    |  |    | 20 |    |    |
| 82 | Mastiff                    | 8  |   |   |    |   |    | 4  |    |  |    | 36 |    |    |

**Supplementary Table S3.** Amplicons sequenced for marker discovery. Start and end positions are given for the Canfam1 dog genome assembly.

| ID      | chr | start    | end      | strand | forward_primer            | reverse_primer           |
|---------|-----|----------|----------|--------|---------------------------|--------------------------|
| SQ_5055 | 15  | 44209944 | 44210739 | +      | ATCTTTTGGGTGTGCTATTTGACT  | AAATTAAGGCTAAAGGCCCATCT  |
| SQ_5058 | 15  | 44278583 | 44279400 | +      | TGTGGATAAGAAAGGATTTGTGAA  | TGACTGAGTCTGTTTCTCCAAAAG |
| SQ_5059 | 15  | 44279555 | 44280363 | +      | CTCCTGATTCTTGTTAACACAACG  | GTGGAGGTTCTCTCATCCTAGA   |
| SQ_5060 | 15  | 44280436 | 44281237 | +      | CCCCAAAAGAAAACAATAACAAAC  | GTAGGTAAAGGTGCTGCCTAGA   |
| SQ_5061 | 15  | 44281219 | 44282019 | +      | GCAGGACACCTTTACCTACTGAAT  | CTGTATACGGAAAGCGGAAACT   |
| SQ_5062 | 15  | 44282104 | 44282905 | +      | CTCTAACTTTGACTCCCTGAGCAT  | TTGCTAAATCTCACTGCTACTGCT |
| SQ_5063 | 15  | 44282902 | 44283698 | +      | GCAAACAGAAGAGGGATTTAGAGA  | TGTTCAAGCTATGCAGAAAAACAT |
| SQ_5064 | 15  | 44283587 | 44284397 | +      | CCTTTCTCTCTAGGCTTCCTATC   | GTTGGGCACATAGTAGACATTCAC |
| SQ_5065 | 15  | 44284500 | 44285297 | +      | GCACAATGAAAGGGAATAAAAGAC  | GATTGTGACATAAAACTGGGACA  |
| SQ_5067 | 15  | 44207925 | 44208725 | +      | GCATCTAAATCCACAGAACACATC  | TATTCCTACTCCTTGGGCAATCTA |
| SQ_5068 | 15  | 44203964 | 44204769 | +      | TCTTAAGGAATGACACACCAACAT  | GGCCTACTGCATCCTAAAAGTAAA |
| SQ_5069 | 15  | 44204669 | 44205466 | +      | GTGACTTGGAACTTTGAGGTTTTT  | GATTCTTTGTTTTCGGTTTGT    |
| SQ_5070 | 15  | 44205443 | 44206251 | +      | AAAACAAACCGAAAACAAGAATC   | TTTTTGCTCTGCTCTAAACTG    |
| SQ_5071 | 15  | 44206202 | 44206811 | +      | AAAAATTTTCTCCACTTGCTGAAT  | TCAATGTTTGTGTAGATGAAACCA |
| SQ_5072 | 15  | 44202415 | 44203222 | +      | AGTTCCTTCTAAGGGAGGAGAGGA  | TCACTGTACCCAGCAGTGAGTTAT |
| SQ_5073 | 15  | 44194696 | 44195503 | +      | ACTGTTCAGAAGGCAATAGGTGTT  | CAATATAGTTCATGTGCTTTTGG  |
| SQ_5074 | 15  | 44195373 | 44196175 | +      | CAAGAGTGTCTCAAGTGGGTTTA   | AGAAATATCCCTAATGTGGCAAC  |
| SQ_5075 | 15  | 44190721 | 44191507 | +      | GTGAATTAGTGTGTTGCATGTCTG  | GTAGGGTGATGGGTGATGACTT   |
| SQ_5076 | 15  | 44182396 | 44183198 | +      | TTTTCAGTTAATCCCTTGGACTGT  | GTAAAATACGTGGGCATTTTCTCT |
| SQ_5077 | 15  | 44183040 | 44183843 | +      | GGAAATCTCCACTTCATGTAATC   | TGGACAAGAAGTTGTACATCCTG  |
| SQ_5078 | 15  | 44183881 | 44184683 | +      | CTCCTCCTTGGACTCAACTGTTAT  | ACATGGTTTAGGTGCTTTTCAAAC |
| SQ_5079 | 15  | 44180832 | 44181617 | +      | AGGCAAAATGAAACAAAAGAAAAT  | GACTATGTTTTGGGGGTTATTTGT |
| SQ_5080 | 15  | 44179584 | 44180385 | +      | AGGTGTAACAACCAACAAGGGTAT  | AAGCACTTCTAAGTCCACCATAGG |
| SQ_5081 | 15  | 44176228 | 44177022 | +      | TATGCTGGAGGTATGAGAAGTTCA  | GGTGAATTTGGAGGAGACTCTAAG |
| SQ_5082 | 15  | 44172863 | 44173660 | +      | ATGAGTTGCTTGTGTCTCTCAAAG  | TGACAGGAGAGATATCGGTAATGA |
| SQ_5083 | 15  | 44167058 | 44167852 | +      | TTGTAGTTGCTTGTCTTTCTTG    | CCTTTTTCTGTCTCTGGACTAAA  |
| SQ_5085 | 15  | 44163979 | 44164784 | +      | TAAAATCCCTTCAGACATTGAACA  | ATTTTTACTGGTCTCACCCATGAT |
| SQ_5087 | 15  | 44158293 | 44159086 | +      | CGGTCTATAATTTGGTATTGAGG   | TGCCACAGTGATTTTAGACTTTGT |
| SQ_5088 | 15  | 44159118 | 44159896 | +      | AATTATTTTGCCAAGTGTAGGC    | CATGCTTTAGATATGTTGGCAATC |
| SQ_5089 | 15  | 44157006 | 44157805 | +      | AGCTCATGTCTTTGGTCAGATGTA  | TGCTTTTAAATCCTGAAAACTCC  |
| SQ_5090 | 15  | 44153555 | 44154358 | +      | TGCAAAGTACATATTGGGCTAAAA  | ATTATACCAAGGTGCCACGTAATC |
| SQ_5091 | 15  | 44147798 | 44148593 | +      | GCACAAAGAGATCATCTGCTCTAA  | CAGAGTTCAAGGATATGTTTATGG |
| SQ_5092 | 15  | 44136451 | 44137251 | +      | AGGCTATACCCAAGAAGGAAGAAT  | CATGACACAAGCCATAGAAAAATC |
| SQ_5093 | 15  | 44137224 | 44138021 | +      | ATTGGATTTTTCTATGGCTTGTGT  | AAGGAAGTGAAGAGGGATAA     |
| SQ_5094 | 15  | 44137998 | 44138796 | +      | TTATCCCTCTTCACTCAGTTCCTT  | TTTATCCTCTCTCAAGCTTTTTGC |
| SQ_5110 | 15  | 43476298 | 43477079 | -      | GCATTCATTCATGGATTTGTCTT   | CCATTATGTTGGGAGCAGTTTCTA |
| SQ_5111 | 15  | 43470933 | 43471630 | -      | TTTTAAAAGTAATTCTTGGGCCTTT | ATTTAGGCAGAACATCCAGTCAAG |
| SQ_5112 | 15  | 43463432 | 43464227 | -      | TCAGGGTCTTTTGTACTTGAAGC   | CCCATTCAAAGCTGAAGATACTG  |
| SQ_5113 | 15  | 43461498 | 43462287 | -      | TGTGAGATGCTGAAAGTGTCTGT   | CACTTAATGCAAAGAGGAAGTGGT |
| SQ_5114 | 15  | 43459745 | 43460545 | -      | GATTGGTGGGTAGTGAAGCTTTG   | GGAAAGCCATGACTTACCAGAAAA |
| SQ_5115 | 15  | 43454946 | 43455745 | -      | AGGATGTTAAGTGGGACTTTTCTT  | CCTTCAACTGTGCTATGTCAAATG |
| SQ5258F | 15  | 44212309 | 44212886 | +      | GGTTGTGGGAAGAAGTTTGTA     | ATCTGGGATTAATTTGGCTTGA   |
| SQ5259F | 15  | 44224603 | 44225116 | +      | TCTCCTCCAGTTTCTTTCTTG     | AAGCACCACAGTAGCAGCATAA   |
| SQ5260F | 15  | 44226141 | 44226769 | +      | TACAATGTGGAGTGACCAGAGG    | GGGTGTAGACGAGATCCTTGAC   |
| SQ5261F | 15  | 44239248 | 44239802 | +      | GGGCTGTTGGTCTAGAAACATT    | AGGTAGCATGTTTGGGCATAGT   |
| SQ5262F | 15  | 44263742 | 44264259 | +      | CCCTATCCAAGATCTCCCTCT     | TCCTTAAGATCTTGCCAGCTTC   |

|         |    |          |          |   |                         |                        |
|---------|----|----------|----------|---|-------------------------|------------------------|
| SQ5263F | 15 | 44278791 | 44278940 | + | GTAGGATTTAGGCATGAAATTGG | TCTTTTGCAAGTTTTGAGTCCA |
| SQ5264F | 15 | 44281218 | 44281817 | + | GGCAGGACACCTTTACCTACTG  | TCAAGTTTCCATTCTCAGCAAA |
| SQ5265F | 15 | 44286696 | 44287216 | + | AAGGAGCTCTGTCTTCTCAG    | AACACGCAGCTTATTGATTCC  |
| SQ5266F | 15 | 44346657 | 44347193 | + | TGTACAGACTGAGGCTTCCAGA  | TGAAGACTCCACAAAGGGATTT |
| SQ5267F | 15 | 44349138 | 44349650 | + | GCTCCTCAGGGTTTTACATTCA  | GCCTCATTACGCCTCATTATCT |
| SQ5268F | 15 | 44350515 | 44351164 | + | AGGCAGTCCTGAACTTGGATA   | TACAGCCTCAGGTTCTTCTGT  |
| SQ5270F | 15 | 43767606 | 43768292 | + | GTTTGATAGCATCTGGGGACTC  | CAACTCTGGCCTTTCTCTCCTA |
| SQ5271F | 15 | 43770961 | 43771602 | + | CAAACAGCCACTAAACAAGCTG  | GCACCTAACTGGGATGATAACC |
| SQ5272F | 15 | 43780580 | 43781279 | + | GTCTCTGCCTTTTTCTGATGCT  | AAATAGAATGGTGGGAAGCTGA |
| SQ5274F | 15 | 43790148 | 43790847 | + | CACAGTTCAGTCCGATGTCACT  | AGCTCCTGGAGAGAGAGAGTCA |
| SQ5275F | 15 | 43799921 | 43800569 | + | CGGAGAGCTCTTATTTTTGCAC  | CATGGCCTTTCTAACGCTTC   |
| SQ5277F | 15 | 43806257 | 43806890 | + | GCCCAAGACATCTGATTTAAGG  | GTCTCTTTCTCCCCATTTTCT  |
| SQ5278F | 15 | 43813427 | 43814075 | + | GACTAGAAGGGGTGTCTTGAA   | ATTTGGCCAACTGGTTTATTTG |
| SQ5280F | 15 | 43842369 | 43842985 | + | GCCCCTTGGCCTTATAACTAAC  | CCCCAGCATCTAGACTATCACC |
| SQ5281F | 15 | 43850762 | 43851400 | + | ATGTGAAACAGCCTCAAGGATT  | TGAGGGAGGAGTTTCTCAATGT |
| SQ5282F | 15 | 43890060 | 43890687 | + | TTTTTGCTCAGTGCAGACAGAT  | CAGCACCCCTAATACTTCTTG  |
| SQ5284F | 15 | 44057335 | 44058030 | + | GGCAGTGTGGAATAAAAAGGAC  | TGGGCTAATTCCAGTAAAGCAT |
| SQ5285F | 15 | 44072590 | 44073221 | + | TCCACTCTCTCCCAGAAAAG    | ATGGTATCCAAGGAGGATAGGG |
| SQ5286F | 15 | 37945959 | 37946566 | + | CTGTTTGGATTGAGCTGTCTG   | ATAAGCTCACTGTCCGATCACA |
| SQ5287F | 15 | 37955025 | 37955678 | + | GCTGTACAGCTCCGTTATTAGT  | CATCTTTTACAAGCCCCTGAAC |
| SQ5288F | 15 | 37959419 | 37960041 | + | CAACCAAGGTAATTGTGTGTGG  | CCAGCTTTCATCCCTTTGATAC |
| SQ5289F | 15 | 37965413 | 37966100 | + | TAAAGTCTGGTAGGCCAAAAA   | CTCCGTCTTCACTCTTGCTTT  |
| SQ5290F | 15 | 37973516 | 37974121 | + | CAACTTTTCAGAGGCCAGTTCT  | ACCTACTGTCCACCTGCTAAGG |
| SQ5291F | 15 | 38002925 | 38003533 | + | GCTGCTGCATCGACTAGTAAAA  | AGCTGTGGAGACTGGAAGAGTC |
| SQ5292F | 15 | 38024901 | 38025584 | + | TGAGAATAAAGGATGGGCAGTT  | GCACAAATGTACGCTAAGCAAG |
| SQ5293F | 15 | 38062267 | 38062870 | + | TCTCATGCCAAAAGAGGTACAA  | ATCCCTTCTGTGATTCCAAATG |
| SQ5294F | 15 | 38072358 | 38073032 | + | GGCATGCCATCTAGCTTTATTC  | TTGTTTCCAAGAACTGCAGAAA |
| SQ5295F | 15 | 38111081 | 38111757 | + | GTTTCTGATCACAGCAACCAAA  | GCATAATGTACCAGGTCTGAA  |
| SQ5296F | 15 | 37028870 | 37029519 | + | CAAGAGGAACCTGGATGAAACC  | CATTTGCATCAAAAGGAGATGA |
| SQ5297F | 15 | 37032497 | 37033185 | + | GAGGAACTTCTGAAGCCAGAGA  | TAAGTGAATGTGCTGCCACTCT |
| SQ5298F | 15 | 37067861 | 37068496 | + | ATGACCGACTCCTTGTGAGTTT  | CAAATGGTTTCACTTTCTTCC  |
| SQ5299F | 15 | 37101098 | 37101769 | + | TGATAGATTGCGATTGTTCCAC  | CATCTAATAGTGCAGCCCAGGT |
| SQ5300F | 15 | 37284853 | 37285523 | + | AGAATGGAATGGAAGTGTGCT   | TTCAGCTTGTGCAGTAGTGCTT |
| SQ5301F | 15 | 37334257 | 37334946 | + | CCCACGTTTATTCCCATGTTAC  | ATCCGGGTAGTAAAGCTCATCA |
| SQ5302F | 15 | 37465569 | 37466198 | + | CAAACAGTAGGCATCTGAACCA  | CCTCAGGAGGTGTTTGATCTTT |
| SQ5303F | 15 | 37618677 | 37619368 | + | AGAGGAAATCCGAAGGAAAAAC  | GAATCCTTGTCCATGGTTGACT |
| SQ5304F | 15 | 37654230 | 37654925 | + | GTAATGCAAATCAAGCAACCAA  | TTTCTCTCCTTCAGAGCTGCTT |
| SQ5305F | 15 | 37698079 | 37698776 | + | TGTTCCTTTTCCAAGGAATGTT  | ATGAGTAATGGCCAAAAGCAGT |
| SQ5306F | 15 | 44568197 | 44568879 | + | CCAGGCTTATCTAGCATCCAAC  | GTTTCAAACCCAAGCCATTAG  |
| SQ5307F | 15 | 44569341 | 44570015 | + | TTTCTCCAAGGTGCTTTTCTA   | GTTGCAGCTTCAAAGGAAAAC  |
| SQ5308F | 15 | 44585145 | 44585808 | + | AATTTCCCCCTTCAAACCTAAC  | AACTCCAGACCTGTGGAAGTA  |
| SQ5309F | 15 | 44586071 | 44586673 | + | GCAAAAATGGACCTAAAGCAAG  | CCCTTGCAATGACTTATGCTTC |
| SQ5310F | 15 | 44596731 | 44597398 | + | GCTGAAGTTCAAGTGACACACA  | TGCTGTAGGACATTTTGCATCT |
| SQ5311F | 15 | 44601228 | 44601891 | + | TCTGAGTGAGGGATCTGTGAGA  | TCTCCAGGTAAGCCATTTGTTT |
| SQ5312F | 15 | 44605591 | 44606289 | + | CCCTTCTGCTTTGTAGACTCGT  | TGTTGGCAGTACATCAGAAACC |
| SQ5313F | 15 | 44612763 | 44613394 | + | GCCAGCTGTGAGTTAGGCTATT  | TTTCTACCTGCCATTTCTCAT  |
| SQ5314F | 15 | 44698337 | 44698968 | + | CTAAGGTTTGGTCCACTTCCAG  | ATTTGTCCCTATTCTCCCCACT |
| SQ5315F | 15 | 44704943 | 44705572 | + | TGCTCTTCTTCACTTTTAGGC   | TTTTTCCCCTTAATTACGCTCA |
| SQ5316F | 15 | 44708081 | 44708761 | + | TTCCGGAAAATGAGGATGATAC  | GCTTCTGCCATTAACCTACAC  |
| SQ5317F | 15 | 44732884 | 44733577 | + | AGGTATTTGCCAGGGTGTCTA   | GAACAAAGTAACAGTGCCACA  |

|         |    |          |          |   |                          |                         |
|---------|----|----------|----------|---|--------------------------|-------------------------|
| SQ5318F | 15 | 44776844 | 44777487 | + | TTGTCAGGATGTAACCCATCAG   | GGTCTAAAATGCTCTGGTTTGG  |
| SQ5319F | 15 | 44782215 | 44782853 | + | AAAGCCTGTGAGAAATGATGGT   | CCAGATTAATATCACCCGCATCA |
| SQ5320F | 15 | 44782215 | 44782853 | + | AAAGCCTGTGAGAAATGATGGT   | CCAGATTAATATCACCCGCATCA |
| SQ5321F | 15 | 44810322 | 44810974 | + | ATTTTCTGCCGTGGTATGAAGT   | AGCAGTTTTATCCGTTGCTCTC  |
| SQ5322F | 15 | 44834614 | 44835215 | + | TAGGAGCACCATAGTCCACAGA   | TGGATACAACCCTTTGAGTGTG  |
| SQ5324F | 15 | 44835364 | 44835970 | + | TCAGAGCAATGGGGTTTTATCT   | TCTGGATACACAATGCAGAACC  |
| SQ5325F | 15 | 44923352 | 44924023 | + | ACCCCAGGAAAATAAAGATGGT   | ATTTCTTTCCAAGGGTCTCTCC  |
| SQ5326F | 15 | 44934676 | 44935360 | + | ACTGCCACAGATCTACCTCCAT   | TTCCCTTGTTGCCTTTTATT    |
| SQ5327F | 15 | 44942372 | 44943012 | + | CATGGGAAACTGGTTTAAAAAT   | GAGGATCCAGGCTAGAAAATGTG |
| SQ5328F | 15 | 44949172 | 44949848 | + | AGCTGAAACTGTCTAGGGCAAG   | AACTGAAAGTAGCGGTTTGCTC  |
| SQ5329F | 15 | 44954416 | 44955088 | + | CAATTGTTACCAGGCAGAGTCA   | GGAGTTTGGATTTGGAGTGTTC  |
| SQ5330F | 15 | 45010358 | 45011024 | + | ATGCAGCAAAATGAAAACATTG   | GCATTTTCATCATGCTTTGTGAT |
| SQ5331F | 15 | 45050399 | 45051008 | + | TGAATGGGCATTTCTCTCTTTT   | ACTTCAAGTGGTCCCACACTTT  |
| SQ5332F | 15 | 45065234 | 45065852 | + | ACTTTCCCCCACCCTCTAAATA   | TGGCCACAGAAAATGTAACCTG  |
| SQ5334F | 15 | 45165425 | 45166091 | + | CTGGACATCCTCCTGACTTC     | GGACATGACAGAGACCTGAGTG  |
| SQ5335F | 15 | 45187154 | 45187756 | + | CTGGAGGCAACCATTACTTTC    | TTTCCCCAGTGCTCCTATTCTA  |
| SQ5336F | 15 | 45337604 | 45338259 | + | TACAGGGCCTCTTACACCAAGT   | TTGTGTGGCCTTACTTCTCA    |
| SQ5337F | 15 | 45339000 | 45339618 | + | GGATCAGGTCGTTTACTTCCAG   | GGTTGGGAGAACAAAATCAGAC  |
| SQ5338F | 15 | 45716536 | 45717136 | + | TGGAGGGAGTAGGGACATGATA   | CTGCAACATCCCTTCTCTTT    |
| SQ5339F | 15 | 45717859 | 45718547 | + | TGACCCCTGGAGTAGGGTACTT   | ATTGGGTGAGCCACAATATCTC  |
| SQ5340F | 15 | 45719292 | 45719985 | + | CCTGGAGAAGAGGGTATGTCAC   | GCAGGACAGGACTCGATATCTT  |
| SQ5342F | 15 | 46501085 | 46501751 | + | CATGTCACGTTTTTACCAGTT    | TCCAAGTCTCCAAACCTAAAA   |
| SQ5343F | 15 | 46514686 | 46515334 | + | CAATCCAAATTCTCCTCCAAAG   | CCTATGCCTGTGTATGAGGACA  |
| SQ5346F | 15 | 46940291 | 46940933 | + | CTCCTGGGTTTCATGGTAATGTT  | AAATTCTGCCATCAGGAAGTGT  |
| SQ5347F | 15 | 46952441 | 46953088 | + | CCCCAGTTCTTCATAGGAGATG   | AACTGGATTGAATTGCGTTTCT  |
| SQ5350F | 15 | 46998455 | 46999067 | + | TCATCTTCAACCCTCTTGACCT   | TAGGAGGATCAGGCATGAATTT  |
| SQ5499F | 15 | 44282413 | 44283018 | + | CCTGCAGAAGTGGAGGATTT     | TTTGCCAGAAGAGGGGAGAGA   |
| SQ5500F | 15 | 44281919 | 44282527 | + | ACATGAAACCCCAAGTCCAA     | TGCAATTCTGTGGGATCTGA    |
| SQ5501F | 15 | 44277687 | 44278288 | + | AGGGCAGAGCACAAATGATTT    | CAGGGGAGTCCCTCAGTGCTA   |
| SQ5502F | 15 | 44226112 | 44226715 | - | AAATCCCCAGTGACAAGTT      | GATCGTCCAGAGGAGTGGAA    |
| SQ5503F | 15 | 44210193 | 44210779 | + | CCATGCATTTGTGGCTCTT      | CCTCAGGGGCACATAAAAAGT   |
| SQ5504F | 15 | 44283643 | 44283832 | - | CATCCAGTTGAGGGATTTGAA    | CACCTGAGGGGCAAACCTATT   |
| SQ5505F | 15 | 25184230 | 25184954 | + | ATGCAAGGGCAAGAGAAAAA     | GGGCTAGAGCTTGAGAACCTT   |
| SQ5506F | 15 | 29997805 | 29998408 | + | TGCCCAGATGATTTTGAGTT     | TGCTAAACAACCTGTGTGTGGA  |
| SQ5507F | 15 | 35584200 | 35584787 | + | TGGGTAAATGTGGGTTTG       | TGGTTTTGCCACAAAAGGAT    |
| SQ5508F | 15 | 36501317 | 36501944 | + | GGTTTTGAAGCACACATAGCC    | CCCATCCCCTCCCTACTAGA    |
| SQ5509F | 15 | 47546976 | 47547624 | + | TTTTAGGGGACATTTTCTG      | GACAAAAGGAAGGGGAAAGC    |
| SQ5510F | 15 | 47995467 | 47996110 | + | TCCAAGGATGGGTTCTCTAAA    | TTTCAGAAGGCCTTGCCTT     |
| SQ5511F | 15 | 50036040 | 50036690 | + | ATAGGAGGAACGCACTGAGG     | TGGTCTCACACCTGAAACCTT   |
| SQ5512F | 15 | 52993336 | 52994108 | + | TGCACCATATTGCTTAAACCAG   | TCTGGGCTGGAGAGTTTCAT    |
| SQ5513F | 15 | 59941967 | 59942550 | + | CAAATTTAGCAGAGTGCAGCAT   | AAAACAGCGGGAGTCAAGC     |
| SQ5514F | 15 | 59947570 | 59948101 | + | TTGCCGTTAGAAAAGGCAGAT    | TCAAGAAAAGGAGGCAAAGTTC  |
| SQ5515F | 15 | 26022374 | 26022930 | + | TCTTATCCAGTTGGCATTCCC    | GCGTGCACACAATATTAACGAT  |
| SQ5516F | 15 | 27184047 | 27184707 | + | TCCCTGAGACTTAACACCTGGA   | CTGTCTCCAACTACTGATGGG   |
| SQ5517F | 15 | 28010859 | 28011412 | + | CCAATAAAAATATCTGAGGCCAGC | CCAAGCCAGTACACTTGACAAA  |
| SQ5519F | 15 | 31046295 | 31046857 | + | CAACAAAGGAGACAGGAGATGC   | AAGATCCATAGGGATTTTCAAGT |
| SQ5520F | 15 | 32008341 | 32008925 | + | TCGTATAAGCCAAACATCACA    | AGACTGGGGTGGGATAACATCT  |
| SQ5522F | 15 | 34074156 | 34074708 | + | CCAAACATCAAATTTCCCGTAA   | ATAGTCTCACTCCTGCGTCTG   |
| SQ5523F | 15 | 34467459 | 34468009 | + | CATCTGTTGCTTCCAAAAAGACA  | GAAAAATTGTGCTTGGCAGTGT  |
| SQ5524F | 15 | 34986364 | 34986964 | + | TGCAGACATGCAGATTTTTGAC   | AATAAAGGGATTTGCTCTCCA   |

|         |    |          |          |   |                              |                             |
|---------|----|----------|----------|---|------------------------------|-----------------------------|
| SQ5525F | 15 | 35999731 | 36000280 | + | TTATAGTGGCCCTGAGGAAAT        | AGGATTTTGTGCCTGCAAAGTA      |
| SQ5526F | 15 | 38481727 | 38482276 | + | CCAGAAGGCACATGTTTCTTAGTA     | ACATCACATAAATCATATTGCCCC    |
| SQ5527F | 15 | 39000249 | 39000967 | + | AAGGGAAATCCAGGCTGTAAAG       | CTATTTCGCTCTGCCACCAC        |
| SQ5528F | 15 | 39508096 | 39508668 | + | GTGCAGAAGCTTCAGATGGAGT       | TCTGACCAGCAAGTCAGTGGTA      |
| SQ5529F | 15 | 39993919 | 39994629 | + | TGATCCTAAAGCATGTTTCCGT       | TGCCAACCTTTTCTCTCATAA       |
| SQ5530F | 15 | 40593041 | 40593596 | + | ACTGTTCAGTCAGGGGGACTTT       | GACAAGGACTCGGAAGAACAGA      |
| SQ5532F | 15 | 41489683 | 41490236 | + | ATGGAGATCACTTCCAGAAGCA       | TCTAGCTCAGGAAAACAGTGC       |
| SQ5533F | 15 | 42118571 | 42119128 | + | AGCCCATGCATACCCTTTTAGT       | AAACACAGCATGGTTACTGCCT      |
| SQ5534F | 15 | 42448417 | 42448969 | + | CGGTGGCTTAAAGGAGGGT          | AGCACAGTGCCTGTCTTGCTAT      |
| SQ5535F | 15 | 42942792 | 42943436 | + | ATGTTCTCCACTGCCACAATCT       | CCCCCATATCAAAGCAGTTACA      |
| SQ5536F | 15 | 43117066 | 43117693 | + | GGGAAAGGCTCCTGTGTTAAGT       | AGGCTATTTACTGCAATGGGGT      |
| SQ5537F | 15 | 43199545 | 43200127 | + | TCCTTCTTTTTCTCAAGTCCC        | GGAACCAGGGCTTAAAGTCATTC     |
| SQ5538F | 15 | 43303070 | 43303656 | + | TGGGCCTAAAATTGTAGAAAACAA     | TTGATTTGCAGGTGAGTCTTCA      |
| SQ5539F | 15 | 49120093 | 49120679 | + | TCTTTTCAAACACATATTTGCCA      | TGTGGATCCTCAGGGTAATCAT      |
| SQ5541F | 15 | 52007173 | 52007735 | + | TGAATGTGATGCTAACATGAAAATACT  | AAGCAGACACAAAATCCATAGCA     |
| SQ5542F | 15 | 54013030 | 54013592 | + | CCACTTGTACAAAACATTGCAT       | AAAACCACAGTGTGAAGATTGC      |
| SQ5543F | 15 | 55016069 | 55016717 | + | GGGATGTTCAATTTCCAATTTCA      | AAAGTTCTGATCGCTTGCTCAC      |
| SQ5566F | 15 | 44115047 | 44115722 | + | GAGCTGGATGTCATACCTTTTCG      | GGCAGACATAGGAGGGAGACTT      |
| SQ5567F | 15 | 44134228 | 44134729 | + | GTCAGCCCATAGAGCTTTTCT        | GAGAGAGAGAGAGATGGGCTCC      |
| SQ5568F | 15 | 44166989 | 44167543 | + | TTCTGCTTCATCTTCTCCTGC        | TGCAATCCTACTCACAGCTTCA      |
| SQ5569F | 15 | 44212301 | 44213076 | + | TGAGAAAAGGTTGTGGGAAGAA       | CCAGAGGATCTCTGTGCTCACT      |
| SQ5570F | 15 | 44228123 | 44228764 | + | ACTAGTTTGGCTGCTTCACTGC       | AGCAGCCATTACCTGTGGTAGA      |
| SQ5571F | 15 | 44231845 | 44232434 | + | CCTAGGCTTTGACTCCACAATG       | AACTGGCTATTTCCCTCTTTGC      |
| SQ5572F | 15 | 44237010 | 44237609 | + | CATTCTGGAGATCAGGGTTCTG       | ACCATTACGCTTCAGTTTGCAT      |
| SQ5573F | 15 | 44244615 | 44245259 | + | GGGAGCAAGGAGAGGAAAGTTA       | CTCTTGTTTCTTGGGGAGACT       |
| SQ5574F | 15 | 44253111 | 44253836 | + | TCCCTCACTGAATTTTCATGCTT      | AGGCTTCATTCAAGGCTAAACC      |
| SQ5575F | 15 | 44260853 | 44261500 | + | TTCCAGCATATTTGTGCTCTT        | ATTTTCTGAGCTTTCCTCCTG       |
| SQ5576F | 15 | 44269651 | 44270298 | + | CCCAAGTTGACATTGGAGAGAG       | AGGGTTTCCAAGCCAAAATTA       |
| SQ5577F | 15 | 44273047 | 44273825 | + | AATGGTGTAGCTCAAACCCAGA       | TTATTGATTGCCACAACCTTCC      |
| SQ5578F | 15 | 44275709 | 44276478 | + | CTTCTCTGGGCAAAAAGGATT        | TGGGTGGGTACGTTTCAAATAG      |
| SQ5579F | 15 | 44293604 | 44294168 | + | GAAAGAGCAAGCAAAAGCGATA       | TCAGTAAGGGCTACAGGGACAA      |
| SQ5580F | 15 | 44310890 | 44311649 | + | ACTTCCATCTTTCCGTAGCCTC       | GAAAACATACCTTCCCACACCA      |
| SQ5581F | 15 | 44280718 | 44281321 | + | TCCAGATGTCTGGGCTACAA         | AGCAATGCCGTTACTTCTCC        |
| SQ5582F | 15 | 44281416 | 44282010 | + | CAACCCCTTTTATGGTCGTC         | CGGAAAGCGGAACTTTCTA         |
| SQ5583F | 15 | 44277923 | 44279921 | + | GGGTGGCTTGTACTTACTGAA        | AAGATCAGTTCGGAGTTTGCTC      |
| SQ5617F | 15 | 44280829 | 44282719 | + | GCAGGTCAGGGTGGGTATTA         | CAGCAGCTTCCAACCCAAT         |
| SQ5650F | 15 | 44101407 | 44101964 | + | TGTTTCATCATGTATTTTTTTTTTCTG  | ACAAATAGCTGAATACCAAGAGG     |
| SQ5651F | 15 | 44102775 | 44103425 | + | TTTTGTGTTGTTTTGTGACTGG       | GTGTCATTGTGGAAGGGTGAAG      |
| SQ5652F | 15 | 44103142 | 44103815 | + | GCATAGATACTTGGCTGGTTCTT      | TCTAAATGGGTTATTCAGTGTACC    |
| SQ5653F | 15 | 44104588 | 44105267 | + | TTAATCACATGCTCATACAGAAATAG   | TGACAAATGCAACTGGGTAAGAA     |
| SQ5654F | 15 | 44108646 | 44109303 | + | CTTTGCGGAGAACAGAAATATG       | GTCAGGCAATGGGTTAAAGAAC      |
| SQ5655F | 15 | 44111842 | 44112532 | + | AATATTTGTGATTTCTTTTGGTGAC    | CTCCATTAACATGAAAAAAAAAAAACT |
| SQ5656F | 15 | 44116223 | 44116892 | + | CTCACAGATCCCTTTTTTTTTTTTAAAG | GTTACCATTTTGCTTTTTTTTTTTTAG |
| SQ5657F | 15 | 44117720 | 44118419 | + | GCAAACACAAACCATGACAAAC       | GGAGTAGAGAAAAAGGGATTTTA     |
| SQ5658F | 15 | 44125676 | 44126358 | + | TCTTGGTATAAACAGGGAAAATAAGC   | CCAGGAGACCATTTCAACATCT      |
| SQ5659F | 15 | 44126961 | 44127659 | + | GCACAGAGGCTATTATTTAACAGG     | AAAATGAAAAAAAAAAAAACCCAAC   |
| SQ5660F | 15 | 44127632 | 44128331 | + | CTCGTTGGGTTTTTTTTTTTTCAT     | AGTGCTTACATGTGTTATTTCACTTA  |
| SQ5661F | 15 | 44136408 | 44137057 | + | TCTGGGACATCTGCTGGTTCTA       | TCCTTAGATAACTTCATTTTCTTGT   |
| SQ5662F | 15 | 44136731 | 44137383 | + | CATGTAGCATGACAAAAGAAAGAA     | CAAGCATGTAGGAAAAAAAAAAAAACA |
| SQ5663F | 15 | 44138324 | 44139016 | + | TTCCAGTAAACAATAGGCAGAA       | TTTCATTGGCTCATTCACTACTC     |

|         |    |          |          |   |                             |                               |
|---------|----|----------|----------|---|-----------------------------|-------------------------------|
| SQ5664F | 15 | 44156989 | 44157609 | + | AACTTGCATTACATTACAGCTC      | TTTCTCCCTCCAATTAACCGTAT       |
| SQ5665F | 15 | 44158391 | 44159064 | + | CTGACTACTTTTTGGGGGTGTC      | GTGCAAATCTACCCTAAGCAACT       |
| SQ5666F | 15 | 44158819 | 44159518 | + | TCAAGCCCAGACAGATAGAGAA      | ACAATAGGAGCTGCAAGGTGTT        |
| SQ5667F | 15 | 44160918 | 44161616 | + | CTTCTTTCCCTTCATGTGCTCTG     | TAAAAATGTTTCCTTGGGCAGGT       |
| SQ5668F | 15 | 44164030 | 44164724 | + | TTGTTACTAGGAGATGTTACAAAAT   | ACTCTACCTTACTTGACCCCAAA       |
| SQ5669F | 15 | 44164548 | 44165246 | + | GTTCCCAGTTCCTTCAGCATCT      | GGGCCACACTTATTTTCACAT         |
| SQ5670F | 15 | 44164971 | 44165667 | + | AGTTTTCTGCATTTTGCCTTTG      | TCTTTTAGAGCACCACATTCACTT      |
| SQ5671F | 15 | 44167362 | 44168058 | + | ACATTTGCCAGTCCTCTCTCTG      | TGCTCAGGTTCTCTCTCCTTTTC       |
| SQ5672F | 15 | 44169630 | 44170299 | + | GCATAGTGTGGAGCCCTATATGT     | AACCATTGTCTAATTTCCCAGTGT      |
| SQ5673F | 15 | 44170101 | 44170788 | + | AGGGTCACAATTCCTGTATGA       | TTGAAATCATGCTACAAAACCTG       |
| SQ5674F | 15 | 44172661 | 44173337 | + | AGGCATATGTATGTTTATTGTCTGTAA | AAAAAAAAAAAAAAAAAGAACCAGGCATC |
| SQ5676F | 15 | 44178129 | 44178818 | + | GAATAACCATCAGGGCAACCT       | TCAGACATACATTAAGAGGAGAAGTCA   |
| SQ5677F | 15 | 44179428 | 44180120 | + | TGTTTTCTATAAGGGAGGCATCA     | TTAAAAAGGGCAAGGCAGAC          |
| SQ5678F | 15 | 44179919 | 44180603 | + | TTTTGCTGCGTCAGGGATA         | GAATAACCTCTTACTTCACAAGAAT     |
| SQ5679F | 15 | 44180309 | 44181008 | + | CGGTATTGGGCATAGATGTGTT      | TGAACATGGAAGAAATGCTGAA        |
| SQ5680F | 15 | 44182135 | 44182827 | + | TTCAAGAAATGTTTACCTAGCTCCT   | ACACCTAAGAGTTGACTGGATTTTT     |
| SQ5681F | 15 | 44182597 | 44183291 | + | CTTCCCTCCTCTTTTTGCTTTA      | AATGTTTGTGCCAATTTCTGGT        |
| SQ5682F | 15 | 44183092 | 44183651 | + | GAATTTGTCACTTTGTACCTAGC     | GGCCCTGGTTGGAATAAAGAT         |
| SQ5683F | 15 | 44183393 | 44184073 | + | TGTCTGGTCCCTTGAATTTGT       | ACACACACACACATAACCACTGC       |
| SQ5684F | 15 | 44183870 | 44184560 | + | CATCTCCTTGCCCTCCTCCTT       | AGCCATATTGGTTTTTCTGAGC        |
| SQ5685F | 15 | 44194765 | 44195456 | + | ACGGGAGACGTTTGAATATAGG      | TGATCTCTGTCCACAAGCTGAA        |
| SQ5686F | 15 | 44195270 | 44195880 | + | TGCATTCTAATCTTGTCTACTTGTG   | TTGTCCAAAGGTTGTTTTATGG        |
| SQ5687F | 15 | 44195662 | 44196361 | + | ATAAACCCAGAGAGCATGAAT       | ACGAATTTTTTCAGCCACTTTTC       |
| SQ5688F | 15 | 44196143 | 44196726 | + | AGGGACTCTGTTTGCCACATTA      | TTTTTCTGACATTGACCAAGTGAT      |
| SQ5689F | 15 | 44199697 | 44200316 | + | TCCTTTCTAGGCCACATTTTGTA     | AGGACTCTCTGTACCCATAAACATC     |
| SQ5690F | 15 | 44203079 | 44203778 | + | AGTGCTGAGAGACCACATTCTT      | ACAGTGCTCATCCTGCCAAAT         |
| SQ5691F | 15 | 44203859 | 44204558 | + | TCTCCATTCTGTTGTATGATTAGTTTT | GACTCTGAAACCTCGAACTGTCT       |
| SQ5694F | 15 | 44206649 | 44207334 | + | CTTAAAGAAACAATAGCACCACA     | CCCCAAATAACGTAACAGTGTC        |
| SQ5695F | 15 | 44209077 | 44209768 | + | CAGTTTCCTAGCTGTACCATGAA     | ACAGTTCCCTAAAATGATGAGTTAGTG   |
| SQ5696F | 15 | 44209538 | 44210230 | + | AGCTCCAGGCTTCTTTTGTTTT      | ATCTTAATCCCTGCCTCTCAAG        |
| SQ5697F | 15 | 44209947 | 44210599 | + | TTTTGGGTGTGCTATTTGACTG      | TGTTGCTGTTTCTCCCTTACTTT       |
| SQ5698F | 15 | 44210264 | 44210937 | + | CATTATTGATAAAGGATCAACAGCA   | TTTTTTTTTTTTTCTTTTTTCTCC      |
| SQ5699F | 15 | 44212992 | 44213670 | + | TCTTATCCTTTTCCCCAACAGA      | AACCAACCTGAGCAAGCTAGAG        |
| SQ5700F | 15 | 44213551 | 44214223 | + | GATTTTTGAAAGGAAAACAGTAGTGAG | AAAAAAAAACTGATGCAAATAATATCAC  |
| SQ5702F | 15 | 44217725 | 44218424 | + | TGGGCAGCTTGTTTCAGTTAG       | TCTTGTGCCATTTTCTGTCTTG        |
| SQ5703F | 15 | 44218187 | 44218873 | + | GTATGACACATCTGGGCACAAC      | AAGAGGTCAAGCGATCAAAGAC        |
| SQ5704F | 15 | 44218661 | 44219357 | + | CCACACTCACACCATAGCATAAA     | TTGAAGTGCCAGAAAGAAGTTG        |
| SQ5705F | 15 | 44220714 | 44221398 | + | GACTCTTTTTTTTTTTTTTGCCCTCT  | TGCTTAAAATGGTCTTGGCATA        |
| SQ5706F | 15 | 44223633 | 44224325 | + | TCTGACCTAGATTTCGTGTCTGTG    | CCCTCCCTGCTAAAAAAAAAAAAATA    |
| SQ5707F | 15 | 44224308 | 44224992 | + | TTTTTTTAGCAGGGAGGGGAAT      | GGGAGGGGTGAGAGATGAGT          |
| SQ5708F | 15 | 44226173 | 44226872 | + | TGAAGTGAGGACGGTGTCTTT       | CCTGAGCATAAAAACTAGGCAGAT      |
| SQ5709F | 15 | 44227910 | 44228593 | + | CACTGATCCAGAAGAATCCAAC      | CAAAGAACCATGTAAGCCTATTTGT     |
| SQ5710F | 15 | 44228302 | 44229001 | + | CTTTGGGTGGGGTCTACTTTCT      | TGCATGAAATGGAAATGCTAAA        |
| SQ5713F | 15 | 44233526 | 44234216 | + | AAACGTGTCAAGGAGTCTAGTGA     | ACGGTAATGTTTCTGCTCTGAAT       |
| SQ5714F | 15 | 44233942 | 44234624 | + | TTCTCAGCTACTAAATCCCCACA     | CGACACTGGTATGTCTCCTGTC        |
| SQ5715F | 15 | 44235687 | 44236386 | + | TGAGAAAGACTATGACGGAAATTG    | ATCACACACAACGCAACTGG          |
| SQ5716F | 15 | 44236164 | 44236854 | + | CCCATAAGGAGAGGCACTGG        | CCCTATTTTCTCCATCAAATTC        |
| SQ5717F | 15 | 44237806 | 44238505 | + | TCTTTGGACAAGATAGCAAACCTCA   | AGGCAGATGTTGAGGGAAATAA        |
| SQ5719F | 15 | 44239394 | 44240078 | + | AGTCTTGGTCTTCACATATCTTCTCA  | GGCCTCCATTGTTCTAAATGTC        |
| SQ5720F | 15 | 44240732 | 44241364 | + | TTCTAGTTCTCCAGATGCACACA     | TCAATTTCATTTTTCTGGTTTT        |

|         |    |          |          |   |                             |                              |
|---------|----|----------|----------|---|-----------------------------|------------------------------|
| SQ5721F | 15 | 44241116 | 44241815 | + | AAGGGAAGACCAAAGGACTAAAA     | TCAAGGCTATCCCAGTCATCAG       |
| SQ5722F | 15 | 44241547 | 44242246 | + | GGAATACCGAGTTCTTGTTCCA      | CTCATGTTGGATTTCTTCTACCA      |
| SQ5723F | 15 | 44242772 | 44243459 | + | CCCCTAATTCATAATACAGTTCATAA  | TCTGGGGTTTTTAAAGTATAAGAGG    |
| SQ5725F | 15 | 44245004 | 44245639 | + | TAGCACACCCAGTCTCAAGAAA      | CCACAGGAAGTGGATAGACATT       |
| SQ5726F | 15 | 44246527 | 44247187 | + | AATGGGCTCCAGTTGACAGA        | CATAGAATGGGGTGCTTAGTG        |
| SQ5727F | 15 | 44246929 | 44247628 | + | ACAAGGGTAAACAGACGAGTGC      | GAGGAGATGGTATAGAATAAGGAGTCA  |
| SQ5728F | 15 | 44247335 | 44248014 | + | AGAGGCCAGTTCTTGTCTGAT       | TGAGCATCATCCAATTATATCACA     |
| SQ5729F | 15 | 44249205 | 44249903 | + | TGATAAACAGAGTGAAGTGGAAATG   | GAGAATGGATATTGGGCAAAAAG      |
| SQ5730F | 15 | 44255137 | 44255834 | + | GGATACATTCACCTGTGGGAGA      | TGCTCAATTAACATACCCTGAGTT     |
| SQ5731F | 15 | 44256686 | 44257383 | + | GAAACTTCCCATTAAGCACAGC      | CACACTCCCAGCCAAAATTC         |
| SQ5732F | 15 | 44257119 | 44257807 | + | GGAAGTAAAGTCAGGCCGTTAG      | GGGTGCCAACACATAAAGAAAT       |
| SQ5733F | 15 | 44257593 | 44258292 | + | TCTCAGTAGTTGAATGCACAGC      | ACTCCTTGTCTCTGCTCATGT        |
| SQ5734F | 15 | 44258000 | 44258696 | + | ACTCTCACCTACAGCCTTTTTCTT    | CACCTTCTCGGATCTCTTCTT        |
| SQ5735F | 15 | 44258458 | 44259157 | + | TTGATTGCTAAAGACCCACAAT      | TGCTAGAATTACAAGGGCAAAA       |
| SQ5736F | 15 | 44258944 | 44259530 | + | TCTCTTGGTGTTCATGTTTC        | TGTTAGGTATCAGAATGGGCTCT      |
| SQ5737F | 15 | 44260806 | 44261502 | + | TGGATACCTTTGAATGCAGTGT      | TTATTTTCTGAGCTTTCCTCCT       |
| SQ5738F | 15 | 44261292 | 44261954 | + | ATAAACAGCCCTCACCTTTGA       | CCATCCCACCCATGAAATTA         |
| SQ5739F | 15 | 44261755 | 44262422 | + | TGCCAGTTTGTGAGCTTTGTT       | GGCTTCATGGTTCTCCTCAAAT       |
| SQ5740F | 15 | 44264051 | 44264750 | + | CAATAGCAAACCTAATGGAACATAATC | CTTCACACAGAGAGTAGCCTTGT      |
| SQ5741F | 15 | 44264917 | 44265544 | + | CTTTGTTCTTATTATTGCCATTGT    | TCCTATGGATTCAAGCATTTC        |
| SQ5742F | 15 | 44265359 | 44266057 | + | GAATCAGCAGAAAAGAAGGAATCT    | AGCTACCCAAAAACAAGGATATTG     |
| SQ5744F | 15 | 44267061 | 44267745 | + | TAAGTGCCCAACACTGATGC        | AAAAAAAAAAGAAAGAAAAGTATGTTGG |
| SQ5745F | 15 | 44269110 | 44269795 | + | CATGCCACTTGGTCTCATAAAG      | AATTCCTTGCCTATTCTTATACATT    |
| SQ5746F | 15 | 44269547 | 44270241 | + | GCCGTCATAGAAATCTCCAGAA      | TGCTAAAACCCCTGTGATGATA       |
| SQ5747F | 15 | 44269990 | 44270661 | + | GCATTGGAATCAGAAAACAGAA      | TGCAGTAAGTTGTACGCCTATTT      |
| SQ5748F | 15 | 44270365 | 44271058 | + | GGTTGCATAATTTCTTTGTGTCC     | AGCAGCCTTCTTCTCTGTTT         |
| SQ5749F | 15 | 44272769 | 44273466 | + | AGTGGTCTTTTGATTGCGTAGA      | CACTTTGCTTTGCTTTGTTTTG       |
| SQ5750F | 15 | 44273445 | 44274105 | + | CAAAACAAAGCAAAGCAAAGTG      | TTGAGAACAACCAAAAGAAAGAAA     |
| SQ5751F | 15 | 44273830 | 44274524 | + | GAAATTCATGCAAAGTTTCAC       | TAATTAATGCAGCTTCCCAGA        |
| SQ5752F | 15 | 44274350 | 44275001 | + | TATCTAGCTCTTCCCGATGTG       | AAAGCAGTCTTCTCACCTCTAC       |
| SQ5753F | 15 | 44274711 | 44275400 | + | ACGTTAAGAAAACCTCCCTTGT      | TTTGATCACTGAACTGACAAGC       |
| SQ5755F | 15 | 44276691 | 44277383 | + | ATCAGCCTCTCCCTTCTATCT       | TGCTCTATGCAAATCAACCTT        |
| SQ5757F | 15 | 44280720 | 44281385 | + | CAGATGTCTGGGCTACAATG        | TTGAAAAATGTCTCCGAATG         |
| SQ5758F | 15 | 44281487 | 44282136 | + | CACGGTACAGTCTGATGTGTT       | TCTGCACTTATGCTCAGGGAGT       |
| SQ5759F | 15 | 44281836 | 44282521 | + | AAACGAGAAGTTGGCATGAAC       | TCTGTGGGATCTGAAAAATTAGC      |
| SQ5760F | 15 | 44282334 | 44283006 | + | GAAAGTTCATATCCACGCTCTA      | GGGAGAGAGAGAGAAGGCAAAAT      |
| SQ5761F | 15 | 44282717 | 44283405 | + | CTGATTTTTCCATTGCTTCTG       | CGGTGCTGTCTTTCAACCTACT       |
| SQ5762F | 15 | 44283207 | 44283902 | + | ACGGAGAAACACACATCTGCTA      | TCTCAATGGCAAAGGCAAGTAT       |
| SQ5764F | 15 | 44285103 | 44285693 | + | AGTGTGCATGGATTGCCTGT        | TTCTCATCCCCTGAGACTACT        |
| SQ5765F | 15 | 44285465 | 44286164 | + | GAGCAGGGCAATAATTCCTAGA      | TTTTAAGAAAGGTGTCAGAAGTC      |
| SQ5767F | 15 | 44291976 | 44292675 | + | TCAGGATGGATTAGGGACAGTT      | TGGGTTTCATGTTTTGTCTATTTT     |
| SQ5768F | 15 | 44292127 | 44292813 | + | GCTCTTTTCTGGCTAATGAA        | AAAAAAAAAAGCAAATTTATCACC     |
| SQ5769F | 15 | 44299670 | 44300345 | + | TCAGAAAGGAGACTACAGCCAGAG    | AGCTGAGATAGAGTGGAGGAACTG     |
| SQ5770F | 15 | 44303438 | 44304136 | + | TGCTCATGGACAAGTACAAATG      | CTTAGCTGGCCCTTGATATAA        |
| SQ5771F | 15 | 44306547 | 44307244 | + | CCATGCAGTAGGCAATCAATAA      | TTGCTGTGTTTTAAGTTTTGAGGT     |
| SQ5772F | 15 | 44319606 | 44320303 | + | GGACAAGAATTTATACGCAACCTT    | CTTAGGATCACTTACTCTCACTTCA    |
| SQ5773F | 15 | 44322640 | 44323337 | + | AGTGGGGATGTGTGCCACT         | CCCCTTTGAAAAAAGT             |
| SQ5774F | 15 | 44323401 | 44324099 | + | AAAAAGGGACAGCCAGGTAG        | CTATTCCTCTCAGGTCCATCTCA      |
| SQ5775F | 15 | 44323860 | 44324543 | + | CATCTGGGCTGTGATGGAT         | CATGTTGTCCACCTGTCACT         |
| SQ5776F | 15 | 44327923 | 44328622 | + | AAGTCAGTGGCGGTGATTATTT      | CAAGGAGCCGATTCATTTTT         |

|         |    |          |          |   |                             |                            |
|---------|----|----------|----------|---|-----------------------------|----------------------------|
| SQ5777F | 15 | 44343049 | 44343748 | + | CATGGAGCGACTGCACTTT         | ATTAGCAAAGCCAGCCAGAA       |
| SQ5778F | 15 | 44343509 | 44344133 | + | CACTATCATCCCTCTCTGTTGC      | AAGACCATGTGAGCATACCAGT     |
| SQ5779F | 15 | 44346728 | 44347421 | + | ATTATGACCCTGCCTTCCTGAC      | CCGCCATGTAAAGTAGTTG        |
| SQ5780F | 15 | 44348348 | 44349047 | + | TAGAGACATACTGGGGGAGATG      | AGAATTTTGTATGCGCTAACACT    |
| SQ5781F | 15 | 44348776 | 44349472 | + | TGGGTTGTAGTTTGTGATTTTGA     | GTGCTCTTTCCCATGTCCACTA     |
| SQ5782F | 15 | 44351519 | 44352198 | + | ATCCAACCTCCTTATCCCCACT      | TGTCTTAGTTTGTGACTCCCTCCT   |
| SQ5784F | 15 | 44354830 | 44355527 | + | GGACTGGCTGGAGATGTTTC        | AAAAAAAAAAAAAAAAACCAATGAGC |
| SQ5785F | 15 | 44356841 | 44357480 | + | TTTCTTCACATTGGACCCTACA      | AAAAATTAAGTCTGCGACCAAAA    |
| SQ5786F | 15 | 44357300 | 44357994 | + | CCCTTTGTGGTATTTGGCTATG      | TGAATGAAGGAGAGAGGGAAGA     |
| SQ5787F | 15 | 44357997 | 44358695 | + | AGGGCAATTAAGGCAATGTTT       | ACAGGTCTTCATAAAAGCAAAGTG   |
| SQ5788F | 15 | 44363153 | 44363710 | + | AGCTTGAGGATTTTTCTGACT       | AGCTTGATGCCAAACACAGAT      |
| SQ5789F | 15 | 44363535 | 44364230 | + | CAAGTAGATTTTCTGGGGGATA      | AAATGTGTGTGGCCTTGG         |
| SQ5790F | 15 | 44365529 | 44366222 | + | AAGACCTGTGAAACCTAAATAAATGAA | TGCAGTGAACCACTTACAAGA      |
| SQ5791F | 15 | 44373895 | 44374594 | + | GTTTCCTCATCTCTCCATCTCA      | AGTCTACTGTCAATGTGTGCATAAAC |
| SQ5792F | 15 | 44378458 | 44379154 | + | TTTCTCTCCCCGCTTATTT         | TCGTCTTTCAGGCCAAGTTAAT     |
| SQ5793F | 15 | 44378946 | 44379637 | + | CAGGTGAGATCAGTGTGCAAAAT     | GTTCTCCTCATCCAAAAACAAAA    |
| SQ5794F | 15 | 44380319 | 44381012 | + | GAAGAATCTGATCATCTTAGACTCAA  | TTTTACAACCTCATGAATTTATTGT  |
| SQ5795F | 15 | 44385931 | 44386581 | + | AGGAATGATATGCAGGCTTGA       | GCTTCAGGAGAGAAGGGCTA       |
| SQ5796F | 15 | 44386359 | 44386994 | + | TGTTTTGAAAGTCAGCTGGAGA      | TCTGTATACTTTGGGGCTATGGA    |
| SQ5797F | 15 | 44392637 | 44393299 | + | AAAGGCACCAGACCCAGATAAC      | TGACCATTCTTGAATGACTAACATC  |
| SQ5798F | 15 | 44393016 | 44393693 | + | TGGAGTTTGTAGAAAGGGATACTT    | CGAGGTATAGAGAAATGAATTGACC  |
| SQ5994F | 15 | 44207528 | 44208012 | + | TCCATCAATCCTGGGTCATT        | CAGACAAAGGTAAAAGAACTGG     |
| SQ5996F | 15 | 44234536 | 44235309 | + | CCATTTTCTGGTCACATCGTT       | TGCTGGCTAAAAGTGAATGG       |
| SQ5997F | 15 | 44241277 | 44242055 | + | CTGAAGGAAACATGGGGTGT        | GTTGGGAAAATGTGCCAGTC       |
| SQ5998F | 15 | 44268781 | 44269593 | + | TACTCATGGCTTTCCCATCC        | TGACGAGTTGTTGGATCAGC       |
| SQ5999F | 15 | 44279309 | 44280007 | + | AAGCGGGCACTGTAAGGAG         | AAGAAGGGAGGGACAGAGAAA      |
| SQ6000F | 15 | 44280733 | 44281534 | + | TACAATGAAATGCCAGCA          | TTTACAAGCAGCGAAGTCCA       |
| SQ6002F | 15 | 44289726 | 44290425 | + | CCCTCCCTCACTAAAATTAAGC      | GATAGCACCTATCAATGATGTTTTT  |
| SQ6003F | 15 | 44355593 | 44356160 | + | ATGAGGAAGAGGGCACAATG        | GCAATGGTAACTTCTTGGAC       |
| SQ6014F | 15 | 44226864 | 44227512 | + | ATGCTCAGGATGGCTCAAGT        | GGGACTCATGATGTGCCTCT       |
| SQ6015F | 15 | 44227362 | 44228100 | + | GTGTAATGGGCCCTCCTCCT        | GGTCTGATCTTCCAACCAG        |
| SQ6016F | 15 | 44228859 | 44229505 | + | TGGGGTAGTAAAGGTGGTTCC       | TCCAATGAAGTACAATTAGTCCA    |
| SQ6017F | 15 | 44229255 | 44230112 | + | AGCTGTGCTTTTTTCAGTCCA       | CAATGTGCAACACAGGGTTT       |
| SQ6018F | 15 | 44230096 | 44230824 | + | CCCTGTGTTGCACATTGTCT        | AAAAATCCCCATTTTTCTCAAA     |
| SQ6019F | 15 | 44230718 | 44231568 | + | CATTTGTTGCTATGGGCTGA        | TTTATGCCTCTTGGAGAACTCA     |
| SQ6020F | 15 | 44232265 | 44233123 | + | AAATGCAATTGGATGCTGT         | GCTCCTATTTCACTCAACTTTCC    |
| SQ6021F | 15 | 44232815 | 44233690 | + | TGGGCCACCCTGTCTAATAA        | GATCCTTCTGCCAAAAGCA        |
| SQ6022F | 15 | 44234404 | 44235102 | + | TTTGTCTGGACAGAAATGTCG       | GTCACGGTGTCTTGTGGA         |
| SQ6023F | 15 | 44234911 | 44235734 | + | GCAGGTATCCCCTTCTCTC         | CAAGTTGGAGCCAGACTCATC      |
| SQ6024F | 15 | 44236810 | 44237088 | + | AAGGAAAGCAGGGATCAGTGT       | CTCAATCCCAGTGCCACA         |
| SQ6025F | 15 | 44237589 | 44237972 | + | TGCAAACCTGAAGCTGAATGG       | AACCACACCTCTTTTCTCCTT      |
| SQ6026F | 15 | 44238408 | 44239249 | + | ACGTGAGGACCAATGTGTCA        | CCCCTTTTTCCCATCATTCT       |
| SQ6027F | 15 | 44225012 | 44225768 | + | ACATTGTGAGGCAGTGGTCA        | TTCACATTCAATGGCAAACCT      |
| SQ6028F | 15 | 44225414 | 44226163 | + | TCTCCTTACCCACCCTTCT         | CCCTCTGGTCACTCCACATT       |
| SQ6047F | 15 | 44218028 | 44219023 | + | CTTATGCTGGGGTCTGAAA         | TCCCAGTGAGAGACCAAGAGA      |
| SQ6048F | 15 | 44286692 | 44287381 | + | TGGGAAGGAGCTCTGTCAAT        | AAACCAACAGCTCCGCTTT        |
| SQ6231F | 15 | 44208537 | 44209235 | + | TTTTGCCTCTCAACTAGCAACTC     | ATGCCATCTACCTACCTCATGG     |



**Supplementary Table S4.** SNP and insertion/deletion variations discovered from sequencing within *IGF1* and flanking loci. For insertion/deletion variations, alleles are given as, e.g. ‘AAA/\*\*\*’, where asterisks indicate the number of bases deleted (or, not inserted) at the position.

| Genome position (Canfam1) | Left flank | Mutation | Right flank |
|---------------------------|------------|----------|-------------|
| 34467609                  | AAAAATATGG | C/T      | CCATTATTTTC |
| 34467705                  | ACCACCCCTT | C/T      | AGGATTCCCC  |
| 34467742                  | TTAAACAGTC | A/G      | GTTGGCTATG  |
| 34467769                  | GACTTTTCAT | C/T      | TACTAAAGCA  |
| 37029157                  | AATGACAGGA | C/T      | GTATCTCCAA  |
| 37029408                  | GAGAAATATT | A/T      | TCCTCTAGAC  |
| 37032637                  | TAATATGAAA | C/T      | GAATAAAACT  |
| 37334423                  | GTTTCAGTCC | A/G      | CAGATGTGTT  |
| 37334731                  | GCAAATCCTA | C/T      | CCATACACTG  |
| 37466132                  | AAGGATAACC | G/T      | TGTGGGATTA  |
| 37946398                  | TGAAACAATA | C/T      | CCAGCCCATG  |
| 37946458                  | TGTCCATCCA | T/G      | CCTTTTGAAA  |
| 38003377                  | ATCATCTCGG | C/T      | CAACTGTTTA  |
| 38062418                  | ATATATTTTT | C/T      | GCATCAGCAG  |
| 38062483                  | CTTGATGTGT | C/*      | CTTTTATTTA  |
| 38072501                  | TAAAATACAG | ACC/***  | CCACCCAAGC  |
| 39508148                  | ACCCCGGGTC | A/G      | TGTGTTTGAC  |
| 39508338                  | TTGAGGTGAC | C/T      | GAGAAGTTCA  |
| 39508364                  | GACCCCATTC | A/G      | GATTCTGGTC  |
| 39508396                  | GTTGACCCTC | A/G      | AGGGCATCCG  |
| 39508458                  | ACACGCTGTG | C/T      | GACTTGTACG  |
| 39508482                  | CTCTGACCAT | C/T      | ACGCAGGCAG  |
| 39508484                  | CTGACCATCA | C/T      | GCAGGCAGTC  |
| 39508511                  | ATCAACACCC | A/G      | AAGGAAGGTG  |
| 39508546                  | GAAGATGCAC | A/G      | CCCAAGACTT  |
| 39508568                  | ACCGTGTCTG | C/T      | CATACACGGA  |
| 39508574                  | ACCGTGTCTG | C/T      | CATACACGGA  |
| 43199781                  | AATCACATGG | C/T      | TGATAGTAGG  |
| 43199823                  | ATTTAATCTC | C/T      | GAAAAAATAG  |
| 43199924                  | ATTGTGCTTC | A/G      | GGATAATTAG  |
| 43200020                  | ATGTCCTCTC | A/G      | GAAGATACTT  |
| 43200053                  | TTTGAAAAC  | C/T      | TGAGTTCCTC  |
| 43200091                  | GTATCCATGT | A/G      | TTCTGTTAGA  |
| 43463997                  | TAAGCACACT | C/T      | ATCCAGGATT  |
| 43471190                  | AATAGTGGTC | C/T      | TGGTTCAGC   |
| 43471401                  | CACTTTCTTT | C/T      | GTAATATTAG  |
| 43471508                  | CTTTGATCAC | C/T      | ATCTTTTTTC  |
| 43471534                  | AATGATAATT | A/G      | CTTCATTGTT  |
| 43767762                  | GGAGGAGAGC | A/C      | GTGCGGCAGC  |

|          |             |             |            |
|----------|-------------|-------------|------------|
| 43767876 | TCTCAGTCCC  | C/G         | CCTGGCGTTG |
| 43768131 | CCCAAGGTGG  | G/T         | CCTAAAATGG |
| 43771302 | AGTTCTGCAT  | C/G         | CTGGTTGCTT |
| 43771473 | GAAGACCAAA  | C/T         | TGGCGTCATA |
| 44103304 | GACTCAGTGg  | TGTG/****   | gtgtgtgtgt |
| 44105030 | attgttttac  | TAT/***     | attaagaatg |
| 44105067 | tcattgttgc  | C/T         | gtaatgtagg |
| 44108838 | AAGGAAcctt  | A/G         | tcttttggtc |
| 44111904 | ttgatttatt  | A/G         | cctctattta |
| 44111958 | gaagaagaaa  | AAAGA/***** | gatacaattt |
| 44112009 | caaattctac  | C/T         | cttggatcca |
| 44116630 | CTGATAGCCA  | G/T         | TGACATTATA |
| 44126223 | GGAAAAAAAA  | A/T         | TTAATTTTTA |
| 44127769 | CACCAAACAG  | A/G         | AAGATTTTGT |
| 44128080 | accagaggct  | G/T         | cattaaatgT |
| 44134426 | TCGAATATAT  | C/T         | TTTGTCCATA |
| 44136626 | TGAACTTTTT  | A/T         | AAATGTTTCT |
| 44137099 | GTTAACCTCAG | G/T         | TTCATAGTGA |
| 44165333 | TAATTTTTTA  | A/G         | TATGCTGTAT |
| 44169713 | taccagattt  | C/T         | cttgccaacc |
| 44170285 | TACACTGGGA  | A/T         | ATTAGACAAT |
| 44170352 | CTTACCCATT  | A/G         | GGCTTATGAC |
| 44173049 | AACTACCCCC  | A/G         | AAATCTCCCT |
| 44173114 | TTTTCCCCCC  | C/*         | AACATTTTCT |
| 44178275 | TTAAAAAAAA  | A/*         | TCCCAGAAAT |
| 44180886 | AGTAAATTAT  | C/T         | AGGCTTTGAT |
| 44184120 | AAAATATACC  | C/T         | TGCATGTGGT |
| 44194828 | GCATTGGATG  | AA/**       | TCAAATGTGT |
| 44195931 | GATTTTCTGG  | G/T         | ATAGTATCTG |
| 44195963 | TGTAGATACT  | A/G         | CATTTTCAAA |
| 44196459 | GTAATATATG  | C/G         | AGACAGCCTG |
| 44196571 | TAAAAAAAAA  | A/*         | GGATTAGTGA |
| 44199850 | CCATCACCGG  | G/T         | TGAAGGAAAG |
| 44200160 | atttatagat  | A/G         | atgctggcat |
| 44202877 | CAAGTACAAG  | A/G         | CTCCTGAGCA |
| 44203214 | TCACTGCTGG  | A/G         | TACAGTGAGT |
| 44204084 | CATACATTTT  | C/T         | CCAATATATG |
| 44204307 | TTCAGTGTCT  | A/G         | TATGTGTATT |
| 44209414 | CTCTAGACTC  | A/G         | CCAATCGAAT |
| 44209812 | TGCCTAAAAA  | C/T         | GATTGGCCTC |
| 44210239 | ATATATATAT  | A/T         | TTTTTTTCTT |
| 44212591 | CTTTTCTGTT  | C/T         | GATATGCAAT |
| 44212736 | GCCTTCTTTT  | C/T         | GCTTTAACAG |
| 44212792 | TAATGATGCT  | C/T         | ACACTTGAA  |
| 44213544 | TAGTATGCAA  | A/C         | TAGACAGATT |

TGTTGACCAACTCATAATAG  
GGAATAA/\*\*\*\*\*

|          |            |       |            |
|----------|------------|-------|------------|
| 44213697 | CCAAGGGAAA | ***** | GTTGACCAAC |
| 44218314 | AACACTATGA | C/T   | AAGTTAAAGT |

|          |             |          |            |
|----------|-------------|----------|------------|
| 44223950 | agcacaaccc  | C/T      | aagcagacaa |
| 44225914 | tgcaggatgc  | A/G      | gaaagaattg |
| 44226324 | TGGGCATGTC  | A/G      | GTGTGGCGCT |
| 44226684 | CTGCCCCACA  | C/T      | GCCTTAGCAC |
| 44228468 | TTCGCCAGCC  | A/G      | GGCCCTGGCA |
| 44231095 | AAATGAGATA  | G/T      | AATGAATTGT |
| 44231412 | attctgtTAC  | A/G      | AGTAAAGAAA |
| 44232955 | tgggagcctg  | A/C      | ttcaccctcc |
| 44234755 | taaaatggac  | A/G      | tatgtaaaag |
| 44235098 | AAGAGACACC  | A/G      | TGACAATGGA |
| 44236627 | GGTATCGAGG  | A/G      | CTCATTCTAA |
| 44236768 | CCTCTTTTTT  | A/G      | GGTTTAATTT |
| 44237388 | GCTTCAGACA  | A/G      | GCCATCACCT |
| 44237485 | ACCCCCCCCC  | C/*      | TTTTGGAAAA |
| 44237985 | GTTGTGGCTT  | A/G      | TCTCCAAGAT |
| 44238540 | TCTAAGTATG  | A/G      | GAAGGTTGCA |
| 44239577 | ACAAATTACC  | C/T      | TGGACTTCTC |
| 44241425 | GTTTCTTCTC  | C/T      | AGGGTGGGGA |
| 44241708 | atggagcacc  | TAAC**** | atgttctaga |
| 44244799 | AAAATGATCT  | C/T      | CATTCACTAA |
| 44245140 | TGCATTTTTT  | T/*      | GTAGGAGACC |
| 44249286 | AGGCTCCTTT  | C/T      | AGTGTGCTGC |
| 44249353 | CTTTTGTCTT  | A/G      | TTTGACACCA |
| 44249558 | TCTTAGaatg  | ATA***   | taataataat |
| 44253397 | CAAATGGACT  | C/*      | CAATAGCTCT |
| 44253636 | TCAAGTTCTA  | C/T      | ATGCTGTTTA |
| 44258017 | CCTACAGCCT  | C/T      | TTTCTTAATG |
| 44258630 | ttaaaaGTA   | GT/**    | tgtgtgtgtg |
| 44259236 | TTAGCTAACC  | C/T      | AATTGCAACT |
| 44260949 | TGACAAAGTC  | A/G      | AGCATACTAA |
| 44261639 | GTGGTGAAGA  | A/T      | TCTGGTGCCA |
| 44261848 | aaattgtgga  | C/G      | tttggattca |
| 44263980 | AGTGGTTTTA  | A/G      | TTTACCCTTC |
| 44264050 | CTTTTAGATT  | c/T      | CAATAGCAAA |
| 44265060 | TCAGAACCAG  | A/C      | CAGAAGTAAG |
| 44265948 | ACTCAAATA   | C/T      | GTAGGAAAAT |
| 44267458 | CTGAACACTG  | C/T      | ATTTTGAAGC |
| 44269183 | CCAAAATCTA  | C/T      | AGTATCCTTA |
| 44270404 | CTGCTGATCA  | A/C      | ATATTGCAAA |
| 44274799 | CAAATTTCAA  | A/G      | TGCAGATCAG |
| 44274840 | AAAAAGAAAA  | CAA***   | AACACTATTA |
| 44277163 | AGGCAATGTG  | C/T      | TGATTTATGT |
| 44277903 | ACCGAGTGGC  | G/*      | GGGGGTGGGG |
| 44278140 | CCTCCTTGGT  | C/T      | CTCACGAGGC |
| 44278880 | AATATCAAAT  | C/T      | CACATATGTG |
| 44278905 | GATTGCCCTC  | C/T      | GTGAACAGGG |
| 44278906 | ATTGCCCTCC  | G/C      | TGAACAGGGC |
| 44279290 | CTATCCAAAG  | A/G      | GCCTTGGAGT |
| 44280625 | aagaaTTCAG  | A/G      | ACAATCCCTC |
| 44281297 | CAGGTA CTGG | G/T      | GGGGGGAGAA |

|          |            |               |            |
|----------|------------|---------------|------------|
| 44281298 | AGGTA      | G/T           | GGGGGAGAAG |
| 44281633 | TTGACTAA   | G/T           | AAAGTCCTAG |
| 44281852 | GAAGTTGGCA | C/T           | GAACGGCAGC |
| 44282040 | TTAAATTATC | C/T           | AAATATCTTG |
| 44282162 | AGCTCCAGAG | A/T           | TCATATTTAA |
| 44282216 | TATGTGGCTT | A/G           | CCTTATAATA |
| 44283403 | AAAGACAGCA | C/T           | CGGGGTGACC |
| 44283574 | GAAAAAATAA | T/*           | TTTTTTTTCT |
| 44284186 | GTTGTCCTGT | A/G           | GCCAGAAAAC |
| 44285600 | TTAGGAGAAA | A/T           | AGAAAGGAGA |
| 44285618 | AGATGTATCT | A/G           | TTAGTAGACA |
| 44285658 | CTAAGCCCAG | A/G           | AAAAGTCCGG |
| 44292077 | GAATTTTGGC | C/T           | TTTTACTCCC |
| 44292534 | GTGGATTTTT | C/T           | AGATAAAGCA |
| 44300004 | tatattcac  | A/G           | aaaaacaggg |
| 44300179 | tcttcttgg  | C/T           | attcccctt  |
| 44311482 | TGTGCTGCCC | C/*           | ATTGGGAGGA |
| 44319631 | CGCAACCTTT | A/T           | CTCCCTCCCA |
| 44320055 | TTTCCTAACA | GTCA/****     | TCAGAGAGAG |
| 44320180 | TACTCACAGC | A/G           | CAGTCACTTC |
| 44320227 | aaaacaaaa  | CAAAA/*****   | aaaacaaaa  |
| 44322763 | ACttaaaaa  | A/C           | aataaaaaat |
| 44324053 | AAATTGTCTG | C/*           | TTTTGTCATG |
| 44324462 | cctctccatc | A/*           | cgttggtgta |
| 44343089 | ATCACCTGCC | A/G           | AGGCATAAAA |
| 44343382 | TGGATGGTAA | A/G           | GATGCTCTGT |
| 44344029 | CTGGGGCTGC | A/T           | TGGACCTTCA |
| 44346926 | GTTATTGAAA | A/G           | AATGCACCTT |
| 44346948 | AAAATTGTTG | C/T           | GCTCTTCACA |
| 44347221 | TTCACAACCA | C/T           | TTTtaaagca |
| 44348436 | TGCTCATCTT | C/T           | CAACCTCACA |
| 44349012 | GTGTGTTCCC | C/T           | CCCTTGGTCA |
| 44349028 | GGTCAGTAAG | C/T           | GTTAGCGCAT |
| 44349040 | TTAGCGCATC | A/G           | AAATTCTTAG |
| 44349100 | AAATAACTGT | A/G           | TACTGGTCC  |
| 44349363 | TTCCCTCACC | A/G           | TTTAGGATTC |
| 44349505 | TACTCAGGAG | C/T           | TAGGGTGGTG |
| 44349542 | GTGGTTTGA  | C/G           | GCTTGGTTCT |
| 44350759 | GTTTGCTAAA | c/T           | TGCTAAGACA |
| 44353046 | AACTTTGGAA | C/T           | AGTCTTCATT |
| 44356907 | ACATGGTGTA | A/C           | CAAGGACTGG |
| 44356919 | AAGGACTGGG | A/T           | AATTCTTTTC |
| 44357667 | agcattacaa | C/T           | caccaccaca |
| 44357909 | TGTTTTTGT  | C/T           | tcctctccc  |
| 44357923 | tctcccctcg | C/T           | ctgtgtcct  |
| 44358189 | CACACCTTCT | SINEC_CF/220* | TCCTTTGATG |
| 44374108 | ATTCTGTatg | 450bp INDEL   | acacagtcaa |
| 44374301 | agaaggacaa | A/C           | cattttatgg |
| 44379120 | GGTTTTTGG  | T/*           | TTTTTTACTT |
| 44386327 | AAAACAAAA  | C/*           | AAAACAAAA  |

|                             |             |                     |            |
|-----------------------------|-------------|---------------------|------------|
| 44392908                    | TTACGGTTTT  | C/T                 | GTTGTGAATA |
| 44393461                    | GTGGGAGACT  | A/G                 | AGGTGGCTCT |
| 44393668                    | gacttcgggc  | A/G                 | ggtcaattca |
| 44568224                    | CCAACCTCCC  | A/G                 | GTAGATTATC |
| 44568247                    | TCAACTCTTT  | G/T                 | AACATTATTC |
| 44568300                    | TCTTGTTTCA  | G/A                 | CCCTAATTCT |
| 44568391                    | CACTTCACAC  | T/A                 | GTGTTTGGCT |
| 44568606                    | GTTGACCATC  | C/T                 | AGTTACATAA |
| 44568721                    | AACATTATGC  | C/T                 | TCTATGTTGA |
| 44569513                    | TTTGAAGAAG  | A/G                 | ACTTTTTAAT |
| 44569631                    | TTTTAATATT  | A/C                 | TCTCAACTGG |
| 44569764                    | TTCCAGTCA   | A/G                 | CTCTTTAGGG |
|                             |             |                     |            |
| 44569821                    | TCGGAAC TTT | *****/TTCTCTAGGATGA | TCTCTAGGAT |
| 44586165                    | AAAGCCACTT  | C/T                 | CTCCCTGTCA |
| 44586326                    | CCTTTGTGGG  | C/T                 | GCCTGGCTCT |
| 44586452                    | GAGGCTGCCC  | T/G                 | GCACAGGCGG |
| 44586461                    | CGGCACAGGC  | T/G                 | GCGAGGCCTG |
| 44586496                    | AGCTGTCCGC  | T/G                 | GTCCTGGCGG |
| 44586505                    | CGGTCCTGGC  | G/C                 | GATGTGGATG |
| 44597038                    | GGATTTTGTG  | C/T                 | ATGTGGTGGG |
| 44605999                    | TGGTTGAATC  | C/T                 | AGAGTTGGCT |
| 44698414                    | GGGCTTCTAT  | G/T                 | GTTTGGGAGG |
| 44698423                    | TTGTTTGGGA  | G/*                 | GAAAAAGAGA |
| 44698644                    | TCTTTTGTTC  | A/G                 | AAACTGGTGA |
| 44698699                    | CTTTGGCAGT  | G/A                 | ACACAGTCCC |
|                             |             |                     |            |
| GGCTTGGTACCAAGACCAA         |             |                     |            |
| CAAAA ACTATGCCTCGGTG        |             |                     |            |
| G/42*(identical 42 bases to |             |                     |            |
| right)                      |             |                     |            |
| 44708219                    | TGGTGCCGGC  | TTTTA/****          | GCTTGGTACC |
| 44708388                    | CTAGGACTCG  |                     | TTTATATCTT |
| 44708483                    | TGAATATCCT  | C/T                 | AACCCTATTT |
| 44782831                    | CCTTCCACCC  | C/T                 | agttttgaga |
| 44810434                    | ATTGCATAAA  | T/C                 | GGGACATGAC |
| 44810520                    | TATATACATC  | T/C                 | TTTGAGTAGA |
| 44834860                    | CCTTGTTATA  | G/A                 | GGTGTAATG  |
| 44834869                    | AGGGTGTAAG  | T/G                 | GAGGGGAGAA |
| 44834881                    | AGGGGAGAAA  | A/T                 | AGTAACTTTT |
| 44835487                    | TCTTTTAGTC  | C/T                 | TTAAAAAATT |
| 44835614                    | CTGAAAAATC  | T/C                 | TAAGAGGCTG |
| 44835660                    | CCAGGAAGAT  | A/G                 | AGAGGAATAT |
|                             |             |                     |            |
| CAGGTGTTTACTT/*****         |             |                     |            |
| 44835743                    | CCCACCCATT  | *                   | AGGTGTTTAC |
| 45010866                    | TTGTTTTTCAG | C/T                 | CATTTTCATC |
| 45187369                    | TGTGTCCACA  | A/C                 | GGGGTCACTG |
| 45187610                    | GTCCAGGCAC  | C/G                 | GACTGCCTGA |
| 45187620                    | GGA CTGCCTG | A/G                 | CTACACGTTA |
| 45337787                    | ACATGGAGCC  | A/G                 | CTGAGCCCAT |
| 45338141                    | CAAGCCTCGC  | A/G                 | GCCACTCAGG |

|          |            |     |            |
|----------|------------|-----|------------|
| 45339308 | GGTCCCGGGA | A/G | ATAACCCACA |
| 45716651 | GCCAACTGCA | A/G | TCTGGTCCCA |
| 45716732 | GCCGACCCCT | A/T | CAGGGGTCCT |
| 45716834 | CCCTGGGAGA | C/T | GACCAGATGT |
| 45716855 | CGGCCTCTCC | C/T | AACCGTGGTC |
| 45716856 | GGCCTCTCCC | A/G | ACCGTGGTCC |
| 45716895 | ATGGCAGACC | A/C | CTCCATAGGT |
| 45717030 | ACTAGGGTCC | T/C | GGGAGAGGAT |
| 45717115 | CTGGGGTCCC | A/G | AAAGAGGAAG |
| 45719374 | ACCTGTGTCC | C/T | GGGGACAGGA |
| 46501108 | TCACCAGTTT | A/G | GATAATTCCT |
| 46501114 | GTTTGGATAA | C/T | TCCTCAGACT |
| 46501616 | CCACCGTTGT | C/G | ACAACTGATG |
| 46952832 | AACTGGCTGA | C/T | TAGGATATAT |
| 46952945 | TTTCTGATTG | C/T | GTGTGTAGGA |
| 49120291 | ATCTGTTTCA | C/T | TCATGAGGTG |
| 49120349 | GAATATTTAC | G/T | TCAGTAAATA |
| 49120484 | CCTGTTCTGT | A/G | TTATTTTCTT |

**Supplementary Table S5.** Insertion of a SINEC\_Cf within an *IGF1* intron was genotyped in 23 dogs from 13 breeds using bi-directional sequencing by standard methods. “SS” = homozygous SINEC\_Cf insertion, “WW” = homozygous non-insertion. “SW” = heterozygous for insertion. The SINEC\_Cf is inserted at chr15:44,228,010 (canFam1) between SNP 4 and SNP 5 (Fig. 3) and has a characteristic 12 bp duplication of the insertion site flanking it. SINEC\_Cf insertion is perfectly correlated with haplotypes B and C.

| Dog No. | Breed                     | SINEC_Cf genotype | <i>IGF1</i> SNP haplotype |
|---------|---------------------------|-------------------|---------------------------|
| 1       | Cav. King Charles spaniel | SS                | BB                        |
| 2       | Chihuahua                 | SS                | BB                        |
| 3       | Italian greyhound         | SS                | BB                        |
| 4       | Japanese chin             | SS                | BB                        |
| 5       | mastiff                   | SS                | BB                        |
| 6       | mastiff                   | SS                | BB                        |
| 7       | miniature schnauzer       | SS                | BB                        |
| 8       | pomeranian                | SS                | BB                        |
| 9       | rottweiler                | SS                | BB                        |
| 10      | shih tzu                  | SS                | BB                        |
| 11      | toy fox terrier           | SS                | BB                        |
| 12      | Italian greyhound         | SS                | CC                        |
| 13      | Saint Bernard             | WW                | FF                        |
| 14      | great dane                | WW                | FF                        |
| 15      | great dane                | WW                | FI                        |
| 16      | Saint Bernard             | WW                | II                        |
| 17      | Cav. King Charles spaniel | WW                | II                        |
| 18      | mastiff                   | WW                | II                        |
| 19      | mastiff                   | WW                | II                        |
| 20      | miniature schnauzer       | WW                | II                        |
| 21      | shih tzu                  | WW                | II                        |
| 22      | bullmastiff               | SW                | BI                        |
| 23      | bullmastiff               | SW                | BI                        |

**Supplementary Table S6.** Genotypes for an *IGF1* promoter CA<sub>n</sub> microsatellite at chr15:44,283,699 - 44,283,736 (Canfam1). Alleles are named as the length of the PCR amplicon in base pairs. Table entries are counts of chromosomes from dogs within all 14 small breeds, all nine giant breeds, and the Portuguese water dog breed.

| Allele | Multiple Breeds |       | Portuguese water dog |
|--------|-----------------|-------|----------------------|
|        | Small           | Giant |                      |
| 203    | -               | 1     | -                    |
| 207    | 16              | 214   | 397                  |
| 209    | 83              | 85    | 23                   |
| 211    | 328             | 12    | 389                  |
| 213    | 8               | 24    | -                    |
| 215    | 28              | 54    | 9                    |
| 217    | 2               | -     | -                    |
| 219    | 89              | -     | -                    |

## References

- S1. R. K. Wayne *et al.*, *J Hered* **80**, 447-54 (Nov-Dec, 1989).  
 S2. J. Yu *et al.*, *Nat Genet* **38**, 203-8 (Feb, 2006).  
 S3. Y. S. Song, Y. Wu, D. Gusfield, *Bioinformatics* **21 Suppl 1**, i413-22 (Jun, 2005).
